# Supplementary material for: Mystifying Molecular Structure, Expression and Repertoire Diversity of IgM Heavy Chain Genes (Ighμ) in Clarias Catfish and Hybrids: Two Novel Transcripts in Vertebrates
Source: PubMed Central journal article supplement (PMC9247300; doi:10.3389/fimmu.2022.884434), 2022-06-17
Supplement: DataSheet_1.pdf [file DataSheet_1.pdf]

1  GCAACACAAGAAGCCCCGAAGTCCCTGTTTCCCGTGTGGCAGTGGCGCTCGTCCCCTGAT 60  
A T Q E A P K S L F P V W Q C G S S P D

61 GGTTTTGTCACTCTGGGCTGCGTCACCCGCGACTTGGCAACCCCTGATGGACTGAGCTAC 120  
G F V T L G C V T R D L A T P D G L S Y

121 GTTTGAAGGATGCGAGCGGCACCGCGCTGACTACTAACGTTGTACAATACCCGGCGGTG 180  
V W K D A S G T A L T T N V V Q Y P A V

181 ATCGAGGGCGAAAAGTACTCCTCAGTGAGTCAGGCGCGCTCAGTGCTAACGACTGGAAC 240  
I E G G K Y S S V S Q A R V S A N D W N

241 GCGAACAAAGAAGTTCACCTTGCGAAGTCACTAATCCCCGGGGAACGAAAACGGCAGAGCTG 300  
A N K K F T C E V T N P R G T K T A E L

301  AAAAAGCCAGTTGTGCCCGACATCCCTGCAAATCTCTGCTTCTAACAGCTCCGAGCCAA 360  
K K P V V P D I P A K S L L L T A P S Q

361 ACAGAATTAGAAAATGGAACAGCTACCTTCATCTGCTTAGCTTCAGAATTTTACCTAAA 420  
T E L E N G T A T F I C L A S E F S P K

421 ACGTCCACATTTAAGTGGACCCGTGGAGGAACAAGCATCGATAATAAGGCCAAAAGACCCC 480  
T S T F K W T R G G T S I D N K A K D P

481 ATTTTAAATCGCGGGAAAACCTACTTACAGTTCCTTTAGTATTTTGGTACTCACTGCTGCC 540  
I L I A G K P T Y S S F S I L V L T A A

541 GAATGGACTGGCTCAACTTCTCCAGTTAAGTGGCAGTTCAGCAGAAGTCACAGACTCTG 600  
E W T G S T S P V K C E F Q Q K S Q T L

601  TCCAAGGAGGCAAGTTATCATTATGTGACCCGGGAGCAGCCAACAATTACAATAATCCCA 660  
S K E A S Y H Y V T R E Q P T I T I I P

661 CCTTCCAACAATGACATGCTTATCAAAAGATCTGGCGACCTCGTGTGCAAGGCTGAAGGA 720  
P S N N D M L I K R S G D L V C K A E G

721 CCATTGGGTTTCACTGGAATTAAGTGGGTTGCTAACGGTAAAGAGTTGTTTCCCTATCT 780  
P L G F T G I K W V A N G K E V V S L S

781 GAAAAAGTTGTGTCTACGAAGGCAGCGATCTCACTCACCACCTCAATCTCTTACGAAGAG 840  
E K V V S T K A A I S L T T S I S Y E E

841 TGGCATAAGGGCATGAAATTTACCTGTGAGGTGCATCATTCTCATTGCTCAGGGGTTT 900  
W H K G M K F T C E V H H S S F A Q G F

901  ATAACAGAAGTCTACAAAAGAGAAAATATGCCTTAACATTTGTATTTCTCTCCTCATC 960  
I T E V Y K R E N Y A L T F V F L F L I

961  ACCCTGTTCTACAGCATCGGGGTGACTGTTATCAAGGTGAAATGGGAAACAATAATGGA 1020  
T L F Y S I G V T V I K V K W E T T N G

1021 ACGATTTTGATTTTCTCTCTGTTTTTTTTTCTTTCAGTATAAGTTGTTTGTGTTTTT 1080  
T I L I F S L F F F S S V \*

1081 TTTTATTTTAGTGTCTGAGTTACCCTTCTGTATCATCTAGAAGATCTCTACATCACGG 1140  
1141 CAAATACTTTTGGACATTTAAATGTTGGACATTTTTCATGCATTTACTCAAATCTCAA 1200  
1201 **ATAAA**TGCTTACAAAAGTATGCAAAATAAAAAAAAAAAAAAAAAAAAAAAAAAAAAAAAAA 1260  
1261 AAA 1263

**Supplementary Fig. 1.** Nucleotide and translated amino acid sequences of the membrane-bound IgM constant domain of the bighead catfish (*Cm\_mIgM* 1.1, GenBank accession number MN934742) and hybrid catfish (hybrid:*Cm\_mIgM* 1.1, GenBank accession number MN934751). The sequence was consisted of three CH and two TM domains: C $\mu$ 1-C $\mu$ 2-C $\mu$ 3-TM1-TM2. The atypical polyadenylation signal (AATAAA) in the 3'-UTR was bold.

1 →Cm\_ighu1  
 GCAACACAAGAAGCCCCGAAGTCCCTGTTTCCCGTGTGGCAGTGC GGCTCGTCCCCTGAT 60  
 A T Q E A P K S L F P V W Q C G S S P D  
 61 GGT TTTGTCACTCTGGGCTGCGTCACCCGCGACTTGGCAACCCCTGATGGACTGAGCTAC 120  
 G F V T L G C V T R D L A T P D G L S Y  
 121 G T T T G G A A G G A T G C G A G C G G C A C C G C G T G A C T A C T A A C G T T G T A C A A T A C C C G G C G G T G 180  
 V W K D A S G T A L T T N V V Q Y P A V  
 181 A T C G A G G G C G A A A G T A C T C C T C A G T G A G T C A G G C G C G T C A G T G C T A A C G A C T G G A A C 240  
 I E G G K Y S S V S Q A R V S A N D W N  
 241 G C G A A C A A G A A G T T C A C T T G C G A A G T C A C T A A T C C C C G G G A A C G A A A A C G G C A G A G A C T G 300  
 A N K K F T C E V T N P R G T K T A E L  
 301 →Cm\_ighu2  
 A A A A G C C A G T T G T G C C C G A C A T C C C T G C A A A A T C T C T G C T T C T A A C A G C T C C G A G C C A A 360  
 K K P V V P D I P A K S L L L T A P S Q  
 361 A C A G A A T T A G A A A A T G G A A C A G C T A C C T T C A T C T G C T T A G C T T C A G A A T T T T C A C C T A A A 420  
 T E L E N G T A T F I C L A S E F S P K  
 421 A C G T C C A C A T T T A A G T G G A C C C G T G G A G A A C A A G C A T C G A T A A T A A G C C A A A G A C C C C 480  
 T S T F K W T R G G T S I D N K A K D P  
 481 A T T T T A A T C G C G G G A A A A C C T A C T T A C A G T T C C T T T A G T A T T T T G G T A C T C A C T G C T G C C 540  
 I L I A G K P T Y S S F S I L V L T A A  
 541 G A A T G G A C T G G C T C A A C T T C C A G T T A A G T G C G A G T T C C A G C A G A A G T C A C A G A C T C T G 600  
 E W T G S T S P V K C E F Q Q K S Q T L  
 601 →Cm\_ighu3  
 T C C A A G G A G G C A A G T T A T C A T T A T G T G A C C C G G G A G C A G C C A A C A A T T A C A A T A A T C C C A 660  
 S K E A S Y H Y V T R E Q P T I T I I P  
 661 C C T T C C A A C A A T G A C A T G C T T A T C A A A A G A T C T G G C G A C C T C G T G T G C A A G G C T G A A G G A 720  
 P S N N D M L I K R S G D L V C K A E G  
 721 C C A T T G G G T T T C A C T G G A A T T A A G T G G G T T G C T A A C G G T A A A G A G G T T G T T T C C C T A T C T 780  
 P L G F T G I K W V A N G K E V V S L S  
 781 G A A A A A G T T G T G T C T A C G A A G G C A G C G A T C T C A C T C A C C A C C T C A A T C T C T T A C G A A G A G 840  
 E K V V S T K A A I S L T T S I S Y E E  
 841 T G G C A T A A G G C A T G A A A T T T A C C T G T G A G G T G C A T C A T T C C T C A T T G C T C A G G G G T T T 900  
 W H K G M K F T C E V H H S S F A Q G F  
 901 →Cm\_ighutm1  
 A T A A C A G A A G T C T A C A A A A G A G A A A A T T A T G C C T T A A C A T T T G T A T T T C T C T T C C T C A T C 960  
 I T E V Y K R E N Y A L T F V F L F L I  
 961 →Cm\_ighutm2  
 A C C C T G T T C T A C A G C A T C G G G G T G A C T G T T A T C A A G G T G A A A T G G G A A C A A C T A A T G G A 1020  
 T L F Y S I G V T V I K V K W E T T N G  
 1021 A C G A T T T T G A T T T T C T C T G T T T T T T T T T C T T C A G T A T A A G T T T G T T T G T T T T G T T T T 1080  
 T I L I F S L F F F S S V \*  
 1081 T T T T A T T T T A G T G T T C T G A G T T A C C C T T T C T G T A T C A T C T A G A A G A T C T C T A C A T C A C G G 1140  
 1141 C A A A T A C T T T T G G A C A T T T A A A T G T T G G A C A T T T T T T C A T G C A T T T A C T C A A A T C T C A A 1200  
 1201 A T A A A T A T T T G A C A A A A A T A T G C A A T T A A A A G T C T A A T T G T T T T C T G T A T C T T T A T T T G A 1260  
 1261 A T T A T A G T C A G C C T T A A A G T A T A G T G T T A T G T T A T T A G C T T A T A T T A C A T G T C T A T A T T 1320  
 1321 T T A T T A G T T T T T A A T A A A T G T C T T A C A A A A A T A T G C G A A A A A A A A A A A A A A A A A A A A A A 1380  
 1381 A A A A A A A 1387

**Supplementary Fig. 2.** Nucleotide and translated amino acid sequences of the membrane-bound IgM constant domain of the bighead catfish (*Cm\_mIgM* 1.2, GenBank accession number MN934743). The sequence was consisted of three CH and two TM domains: C<sub>μ</sub>1-C<sub>μ</sub>2-C<sub>μ</sub>3-TM1-TM2. The atypical polyadenylation signal (AATTTAA) in the 3'-UTR was bold.

→ *Cm\_ighu1*  
1 | GCAACACAAGAAGCCCCGAAGTCCCTGTTTCCCGTGTGGCAGTGCGGCTCGTCCCCTGAT 60  
| A T Q E A P K S L F P V W Q C G S S P D  
61 | GGTTTTGTCACTCTGGGCTGCGTCACCCGCGACTTGGCAACCCCTGATGGACTGAGCTAC 120  
| G F V T L G C V T R D L A T P D G L S Y  
121 | GTTTGGAAAGGATGCGAGCGGCACCGCGCTGACTACTAACGTTGTACAATACCCGGCGGTG 180  
| V W K D A S G T A L T T N V V Q Y P A V  
181 | ATCGAGGGCGGAAAGTACTCCTCAGTGAGTCAGGCGCGCTCAGTGCTAACGACTGGAAC 240  
| I E G G K Y S S V S Q A R V S A N D W N  
241 | GCGAACAAGAAGTTCACTTGCGAAGTCACATAATCCCCGGGGAACGAAAACGGCAGAGCTG 300  
| A N K K F T C E V T N P R G T K T A E L  
301 | AAAAAGCCAGTTGTGCCCCGACATCCCTGCAAAATCTCTGCTTCTAACAGCTCCGAGCCAA 360  
| K K P V V P D I P A K S L L L T A P S Q  
→ *Cm\_ighu2*  
361 | ACAGAATTAGAAAATGGAACAGCTACCTTCATCTGCTTAGCTTCAGAATTTTCACCTAAA 420  
| T E L E N G T A T F I C L A S E F S P K  
421 | ACGTCCACATTTAAGTGGACCCGTGGAGGAACAAGCATCGATAATAAGGCCAAAGACCCC 480  
| T S T F K W T R G G T S I D N K A K D P  
481 | ATTTTAAATCGCGGGAAAACCTACTTACAGTTCCTTTAGTATTTTGGTACTCACTGCTGCC 540  
| I L I A G K P T Y S S F S I L V L T A A  
541 | GAATGGACTGGCTCAACTTCTCCAGTTAAGTGCAGTTCAGCAGAAGTCACAGACTCTG 600  
| E W T G S T S P V K C E F Q Q K S Q T L  
601 | TCCAAGGAGCAAGTTATCATTATGTGACCCGGGAGCAGCCAACAATTACAATAATCCCA 660  
| S K E A S Y H Y V T R E Q P T I T I I P  
→ *Cm\_ighu3*  
661 | CCTTCCAACAATGACATGCTTATCAAAAGATCTGGCGACCTCGTGTGCAAGGCTGAAGGA 720  
| P S N N D M L I K R S G D L V C K A E G  
721 | CCATTGGGTTTCACTGGAATTAAGTGGGTTGCTAACGGTAAAAGAGGTTGTTTCCCTATCT 780  
| P L G F T G I K W V A N G K E V V S L S  
781 | GAAAAAGTTGTGTCTACGAAGGCAGCGATCTCACTCACCACTCAATCTCTTACGAAGAG 840  
| E K V V S T K A A I S L T T S I S Y E E  
841 | TGGCATAAGGGCATGAAATTTACCTGTGAGGTGCATCATTCTCATTGCTCAGGGGTTT 900  
| W H K G M K F T C E V H H S S F A Q G F  
901 | ATAACAGAAGTCTACAAAAGAGAAAATTTATGCCTTAACATTTGTATTTCTCTCTCATC 960  
| I T E V Y K R E N Y A L T F V F L F L I  
→ *Cm\_ighutm1*  
→ *Cm\_ighutm2*  
961 | ACCCTGTTCTACAGCATCGGGGTGACTGTTATCAAGGTGAAATGGGAAACAATAATGGA 1020  
| T L F Y S I G V T V I K V K W E T T N G  
1021 | ACGATTTGATTTTCTCTCTGTTTTTTTTTCTTTCAGTATAAGTTTGTGTTTGTGTTTT 1080  
| T I L I F S L F F F S S V \*  
1081 | TTTTATTTTGTGTTCTGAGTTACCCTTTCTGTATCATCTAGAAGATCTCTACATCACGG 1140  
1141 | CAAATACTTTTGGACATTTAAATGTTGGACATTTTTTTTCATGCATTTACTCAAATCTCAA 1200  
1201 | ATAAATATTTGACAAAAATATGCAATTAAGTCTAATGTTTCTGTATCTTTATTTGA 1260  
1261 | ATTATAGTCAGCCTTAAAGTATAGTGTATTATGTTATTAGCTTATATTACATGTCTATATT 1320  
1321 | TTATTAGTTTTTAATAAAATTAATAAGACGTTTCGATGACAGTAGTGTTCCTCAGTTT 1380  
1381 | GCTGTTGAAACATAGTAAACTATTGAGTTATATTATTTATTTGATCTTTTTAGCTAATAG 1440  
1441 | ATGTAGAGATCCTGGTGTGACCAACCTTTCTACAATGAGACAGAAGTTGATGATGACA 1500  
1501 | ACGTGGCAACCACTGCCTTAACATTTGTATTTCTCTTCTCATCACCTGTCTACAGCA 1560  
1561 | TCGGGGTGACTGTTATCAAGGTGAAATGAGAAAC**AATAAA**TGCAATTAAGTCAAAAAA 1620  
1621 | AAAAAAAAAAAAAAAAAAAAAA 1641

**Supplementary Fig. 3.** Nucleotide and translated amino acid sequences of the membrane-bound IgM constant domain of the bighead catfish (*Cm\_mIgM* 1.3, GenBank accession number MN934744). The sequence was consisted of three CH and two TM domains: C<sub>μ</sub>1-C<sub>μ</sub>2-C<sub>μ</sub>3-TM1-TM2. The atypical polyadenylation signal (AATTTAA) in the 3'-UTR was bold.

1 *Cm\_ighu1*  
GCAACACAAGAAGCCCGAAGTCCCTGTTTCCCGTGTGGCAGTGC GGCTCGTCCCCTGAT 60  
A T Q E A P K S L F P V W Q C G S S P D

61  
GGTTTTGTCACTCTGGGCTGCGTCACCCGCGACTTGGCAACCCCTGATGGACTGAGCTAC 120  
G F V T L G C V T R D L A T P D G L S Y

121  
GTTTGAAGGATGCGAGCGGCACCCGCGTACTACTAACGTTGTACAATACCCGGCGGTG 180  
V W K D A S G T A L T T N V V Q Y P A V

181  
ATCGAGGGCGGAAAGTACTCCTCAGTGTAGTACAGGCGCGCTCAGTGTAAACGACTGGAAC 240  
I E G G K Y S S V S Q A R V S A N D W N

241  
GCGAACAAGAAGTTCAC'TGCGAAGTCACTAATCCCCGGGAACGAAACGGCAGAGCTG 300  
A N K K F T C E V T N P R G T K T A E L

301 *Cm\_ighu2*  
AAAAAGCCAGTTGTGCCCCGACATCCCTGCAAAATCTCTGCTTCTAACAGCTCCGAGCCAA 360  
K K P V V P D I P A K S L L L T A P S Q

361  
ACAGAATTAGAAAATGGAACAGCTACCTTCATCTGCTTAGCTTCAGAATTTTCACCTAAA 420  
T E L E N G T A T F I C L A S E F S P K

421  
ACGTCCACATTTAAGTGGACCCGTGGAGGAACAAGCATCGATAATAAGGCCAAAGACCCC 480  
T S T F K W T R G G T S I D N K A K D P

481  
ATTTTAATCGGGGAAAACCTACTTACAGTTCCTTTAGTATTTTGGTACTCACTGCTGCC 540  
I L I A G K P T Y S S F S I L V L T A A

541  
GAATGGACTGGCTCAACTTCTCCAGTTAAGTGCAGATTCCAGCAGAAGTACAGACTCTG 600  
E W T G S T S P V K C E F Q Q K S Q T L

601 *Cm\_ighu3*  
TCCAAGGAGCAAGTTATCATTATGTGACCCGGGAGCAGCCAACAATTACAATAATCCCA 660  
S K E A S Y H Y V T R E Q P T I T I I P

661  
CCTTCCAACAATGACATGCTTATCAAAAGATCTGGCGACCTCGTGTGCAAGGCTGAAGGA 720  
P S N N D M L I K R S G D L V C K A E G

721  
CCATFGGGTTTCACTGGAATTAAGTGGTTGCTAACGGTAAAGAGGTTGTTTCCCTATCT 780  
P L G F T G I K W V A N G K E V V S L S

781  
GAAAAGTGTGTCTACGAAGGCAGCATCTCACTACCACCTCAATCTCTTACGAAGAG 840  
E K V V S T K A A I S L T T S I S Y E E

841  
TGGCATAAGGGCATGAAATTTACCTGTGAGGTGCATCATTCTCATTGCTCAGGGGTTT 900  
W H K G M K F T C E V H H S S F A Q G F

901 *Cm\_ighu4*  
ATAACAGAAGTCTACAAAAGAGAAAATGGCCGAAACGCTAACAGCCAGGGGTTTCTTG 960  
I T E V Y K R E N G R T P N C P G V F L

961  
CTCCCGCCACCAGAGAGCTCAAATGGGGATTTGAAGACCCTGACTTGCTATATAAAAAAC 1020  
L P P P E S S N G D L K T L T C Y I K N

1021  
TTTTACCCTAAGGAGGTTGCTGTGCTTTGGCTTATTGGTGATAAAACAAGTGGACAATGAG 1080  
F Y P K E V A V S W L I G D K Q V D N E

1081  
AGCATCACTAAAGTTATTGAGAAAAATGGCAACTTTTTCAGCATAACAGTACAGTGTGTC 1140  
S I T K V I E K N G N F S A Y S Q L I V

1141  
AATCAGGACTCCTGGGAAATGGCACAGAGTTACCTGCAATGTTTATCATGAGTCCATC 1200  
N Q D S W G N G T E F T C N V Y H E S I

1201  
ATGGATAATCTTCGCCACCTTTCCAGAACCATTACTGGCACTTCAATCCACCCTCCATA 1260  
M D N L R H L S R T I T G T S N P P S I

1261 *Cm\_ighutm1*  
GTGAATCTCAGCCTAAATGTTCCCCAAAACCTGCCAAATCTGGTCTGTATGCCTTAACA 1320  
V N L S L N V P Q N C P N P G L Y A L T

1321 *Cm\_ighutm2*  
TTTGTATTTCTCTCTCCTCATCACCTGTTCTACAGCATCGGGGTGACTGTTATCAAGGTG 1380  
F V F L F L I T L F Y S I G V T V I K V

1381  
AAATGGGAAAACAATAATGGAACGATTTTGATTTTCTCTGTTTTTTTTTCTTTCAGTA 1440  
K W E T T N G T I L I F S L F F F S S V

1441  
TAAGTTGTTGTTTGTGTTTTTTTTTATTTTAGTGTCTGAGTTACCCCTTCTGTATCATC 1500  
\*

1501  
TAGAAGATCTCTACATCACGGCAAATACTTTTGGACATTTAAATGTTGGACATTTTCTTTC 1560

1561  
ATGCATTTACTCAAATCTCAAATAAATATTTGACAAAAATATGCAATTAAGTCTAATT 1620

1621  
GTTTTCTGTATCTTTATTTGAATTATAGTCAGCCTTAAAGTATAGTGTATGTTATTAG 1680

1681  
CTTATATTACATGTCTATATTTTATTAGTTTTTAATAAAATTAATTAAGACGTTTCGATGA 1740

1741  
CAGTAGTGTCTCTCAGTTTGTGTTGAAACATAGTAAACTATTGAGTTATATTATTT 1800

1801  
ATTGATCTTTTTAGCTAATAGATGTAGAGATCCTGGTGTGACCAACCTTTTCTACAATG 1860

1861  
AGACAGAACCTTGATGATGACAACCTGGCAACCACTGCCTTAACATTTGATTTCTCTTCC 1920

1921  
TCATCACCTGTTCTACAGCATCGGGGTGACTGTTATCAAGTGAAATGAGAAACAATTA 1980

1981  
ATGCAATTAAGTCAAAAAAAAAAAAAAAAAAAAAAAAAAAAAA 2022

**Supplementary Fig. 4.** Nucleotide and translated amino acid sequences of the membrane-bound IgM constant domain of the bighead catfish (*Cm\_mIgM 2*, GenBank accession number MN934745). The sequence was consisted of three CH and two TM domains: C $\mu$ 1-C $\mu$ 2-C $\mu$ 3-C $\mu$ 4-TM1-TM2. The atypical polyadenylation signal (AATTTAA) in the 3'-UTR was bold.

1 →Cm\_ighu1  
GCAACACAAGAACCCGAGTCCCTGTTCCCGTGTGGCAGTCGGGCTCGTCCCTGAT 60  
A T Q E A P K S L F P V W Q C G S S P D

61 GGTTTGTCACTCTGGGCTGGCTACCCGGGACTTGGCAACCCCTGATGACTGAGCTAC 120  
G F V T L G C V T R D L A T P D G L S Y

121 GTTTGGAAGGATGCGAGCGCACCCGGCTGACTACTAAGTGTACAATACCCGGGCTG 180  
V W K D A S G T A L T T N V V Q Y P A V

181 ATCGAGGGCGAAAGTACTCCTCAGTGTAGTCAGGCGGCGTCACTGCTAACGACTGGAAC 240  
I E G G K Y S S V S Q A R V S A N D W N

241 GCGAACAAGAAGTCTACTTGGCAAGTCACTAATCCCGGGGAACGAAACGGCAGAGCTG 300  
A N K K F T C E V T N P R G T K T A E L

301 AAAAAAGCAAGTGAATGTGACTTCGCCAGCATCAGCATCAGCACAAGCTTCGACACA 360  
K K F E V N V T S P S I S I S T S F D T

361 ACAACTAACGATACTAATCTGATTGCTGGTGGATGTTTACGCCCTAAAGCGATTAA 420  
T T N D T N L I C W L D G F S P K A I N

421 GTTACTTGGGAGCGGTAAAGAAAGGACTGAGAGAAAATTCAAAAATGAGAAAATAAA 480  
V T W G A G K K G T E R K F K N E E N K

481 AAGTTTGCATCTGAGCAAAATCAGCATAAATGCGAGCAATGGAAGAAGGCAAGAG 540  
K F A M L S Q I S I N A E Q W K E G K E

541 TTCACCTGCAGCGCACACAAGTCAAACCTACAGTCAAACATGGAGCATTTGTAAA 600  
F T C S A T H K S K T Y S Q T W S I C K

601 GGCCATCAAATCTGAACACGGATACGCTGGAGAACTGCTCTCAGTCCATATTG 660  
G H L N S E P R I R L E K P A L R S I L

661 ACAGATACAGTGTACAGTCTCCTGTGTTGTAAGTGTGTTCCAGCCTAAAGTTTTA 720  
T D T R V T V S C V V E T V F Q P K V L

721 TGGCTGTAGATGGAAGCACAATACTGACACAGACATTATCAGTGAGAGTCAAGCGGAG 780  
W L V D G S T K S D T D I I S E S Q G E

781 TCCACTGTTAGCAACTGACTATTTCTGTAGAAGCTGGCAAAAATCAAACACAATAACC 840  
S T V S K L T I S V E D W T K S N T I T

841 TGCAGGCGCAACATCATTGTTGAGATCTCTAGATGTTTCAAACTACAGAAACT 900  
C R A E H P L L R S S R C S F K T T E T

901 GTGCAGAAACGCTACAGTGGAGATCAGAAGGACTTGAAGACGTAGGGAAGAGAGAC 960  
V Q K R P T V E I R R S L E D V G K R D

961 AGTCAGTCTGGAGTGTGCAAGCGCTGCTCCTCGTGAAGTCTCTGTCACTCTC 1020  
S A V L E C A A S G L P P G E L S V T F

1021 CAGGCCAATAATGTGAATTTCCAGAAGCTCAGTATGTTAATCTACAAAAGGCCAGGAC 1080  
Q A N N V N F P E A Q Y V N L P K G Q D

1081 ACACTAGTTGCACTTTTCACTAATCTTGGAAACACCGAAGCAAGCATCGTTCACT 1140  
T L V A L F T I P G T H R T E Q H R F T

1141 TGTGAGATTCAGACAAGCGTTCCTTAAAAATGGAGTCCAATTTATAGAAAACCTTTTT 1200  
C E I Q T S R S L K W R S N F I G N L F

1201 AGTGATCTTTAGTGGAACTTTCACTGTTGATCCAGTGAAGATAAATCTGCATCAACCGCA 1260  
S D P L V E L S V V S S E D K S A S T A

1261 CAAAAACTTCTTTCATGGAAGTGGCTTAAACCCAGAGATCAAGTGGCTCCCGAATCT 1320  
Q K L L C Y G T G L N P E I K W L P E S

1321 GTGGAAATAAATAAAGTGAATGAACAAATGAATGAAGTGAAGTCAAGTCTGCAAGC 1380  
V G N N K S E V T M N E D G R V K V S S

1381 GAGCTTTCAGTTACAGAACAAGAGTGAACCGTGAACCTACATTCACCTGCCAAGTCA 1440  
E L S V T E Q E W N R G T T F T C Q V S

1441 GATCAGGCTCGTCTCAACACTGTTCCAGAAGAGCATCAGTTTCTGCACTCTCACTGAGAT 1500  
D Q G R L N T V Q K S I S F C A V T P D

1501 CATGCTCGGAGTGCACAGGTTTACCTTTGGGTCCCTCCATCAGTAAATGCGCAGAGGAG 1560  
H A R S A Q V Y L L G P S I S N M P E E

1561 GATCCTGCTCTGTACATGCTGCTGTGGGCAATAGCTCCAGACTTCTCAGTTAAT 1620  
D P V S V T C L L L G H R L Q D F S V N

1621 TGCAAGTAGGACCGCAATTTGCTTCAAATGTGATCAAACCTGAAATCCACGGCAAT 1680  
C K V G T D N L S S N V I K T E I H G N

1681 GGAACAGAGAAATGTAAGGGTTATAAGGGTTCAGCTGAAAGTGGAAAAACCATGAA 1740  
G T E N V Q R V I R V P A E K W K N H E

1741 AATGTTCCGTGAGTGAACACCCCTGCTGTGGCCGACATCCCTGCAAAATCTCTG 1800  
N V S C E V K H P C I V V P D I P A K S L

1801 CTCTAACAGCTCGAGCCAAACAGAAATAGAAAATGGAACAGCTACCTCATCTGCTTA 1860  
L L T A P S Q T E L E N G T A T F I C L

1861 GCTTCAGAAATTTACCTAAAACGTCACATTTAAGTGGACCGTGGAGGAACAAGCATC 1920  
A S E F S P K T S T F K W T R G G T S I

1921 GATAATAAGCCAAAGCCCAATTTAATCGCGGAAAACCTACTTACAGTTCTTTAGT 1980  
D N K A K D P I L I A G K P T Y S S F S

1981 ATTTGGTACTCACTGCTGCCGAATGGACTGGCTCAACTTCTCCAGTTAAGTGGAGTTC 2040  
I L V L T A A E W T G S T S P V K C E F

2041 CAGCAGAAGTACAGACTCTGCAAGGAGGCAAGTTATCATTATGTGACCCGGGAGCAG 2100  
Q Q K S Q T L S K E A S Y H Y V T R E Q

2101 CCAACAATTACAATAATCCACCTTCCAACAATGACATGTTATCAAAGATCTGGCGAC 2160  
P T I T I I P P S N N D M L I K R S G D

2161 CTCGTGTCAAGGCTGAAGGACATTGGGTTTCACTGGAATTAAGTGGGTTGCTAACGGT 2220  
L V C K A E G P L G F T G I K W V A N G

2221 AAAGAGGTTGTTCCCTATCTGAAAAGTTGTCTACGAAGCAGCGATCTCACTACC 2280  
K E V V S L S E K V V S T K A A I S L T

2281 ACCTCAATCTCTACGAAGTGGCATAAGGGCAATAAATACCTGTGAGGTGCATCAT 2340  
T S I S Y E E W H K G M K F T C E V H H

2341 TCCTCATTTGCTCAGGGTTTATAACAGAAGTCTACAAAAGAGAAAATATGCCTTAACA 2400  
S S F A Q G F I T E V Y K R E N Y A L T

2401 TTTGATTTCTCTCTACCTCCTGTTCTACAGCATCGGGTGAAGTTTATGTTGACCGGAGTG 2460  
F V F L F L I T L F Y S I G V T V I K V

2461 AAATGGAAACAACATATGGAACGATTTTGAATTTTCTCTCTGTTTTTTTTTCTTCAGTA 2520  
K W E T T N G T I L I F S L F F F S S V

2521 TAAGTTGTTGTTGTTTTTTTTTATTTAGTGTCTGAGTTACCTTTCTGTATCATC 2580  
\*

2581 TAGAAGATCTTACATCACGGCAAACTTTTGGACATTTAATGTTGGACATTTTTTCT 2640  
2641 ATGCATTTACTCAAATCTCAAATAAATGCTTTACAAAGTATCAAATAAAAAAAAAAAAAA 2700  
2701 AAAAAAAAAAAAAAAAAAAAAA 2724

**Supplementary Fig. 5.** Nucleotide and translated amino acid sequences of the membrane-bound IgM constant domain of the bighead catfish (*Cm\_mIgM 3*, GenBank accession number MN934746). The sequence was consisted of seven CH and two TM domains: C $\mu$ 1-C $\delta$ 2-C $\delta$ 3-C $\delta$ 4-C $\delta$ 5-C $\mu$ 2-C $\mu$ 3-TM1-TM2. The atypical polyadenylation signal (AATTTAAA) in the 3'-UTR was bold.

→ *Cm\_ighu1*  
1 | GCAACACAAGAAGCCCCGAAGTCCTGTTTCCCGTGTGGCAGTGGCGGCTCGTCCCCTGAT 60  
| A T Q E A P K S L F P V W Q C G S S P D  
61 | GGTTTTGTCACTCTGGGCTGCGTCACCCGCGACTTGGCAACCCCTGATGGACTGAGCTAC 120  
| G F V T L G C V T R D L A T P D G L S Y  
121 | GTTTGGAAGGATGCGAGCGGCACCCGCGTACTACTAACGTTGTACAATACCCGGCGGTG 180  
| V W K D A S G T A L T T N V V Q Y P A V  
181 | ATCGAGGGCGAAAGTACTCCTCAGTGAGTCAGGCGCGCTCAGTGCTAACGACTGGAAC 240  
| I E G G K Y S S V S Q A R V S A N D W N  
241 | GCGAACAAGAAGTTCACCTTGCAGTCACTAATCCCGGGGAACGAAAACGGCAGAGCTG 300  
| A N K K F T C E V T N P R G T K T A E L  
→ *Cm\_ighu2*  
301 | AAAAAAGCCAGTTGTGCCCCGACATCCCTGCAAAATCTCTGCTTCTAACAGCTCCGAGCCAA 360  
| K K P V V P D I P A K S L L L T A P S Q  
361 | ACAGAATTAGAAAATGGAACAGCTACCTTCATCTGCTTAGCTTCAAGATTTTCACCTAAA 420  
| T E L E N G T A T F I C L A S E F S P K  
421 | ACGTCCACATTTAAGTGGACCCGTGGAGGAACAAGCATCGATAATAAGGCCAAAGACCCC 480  
| T S T F K W T R G G T S I D N K A K D P  
481 | ATTTTAATCGCGGGAAAACCTACTTACAGTTCCTTTAGTATTTTGGTACTCACTGCTGCC 540  
| I L I A G K P T Y S S F S I L V L T A A  
541 | GAATGGACTGGCTCAACTTCTCCAGTTAAGTGGGAGTTCAGCAGAAGTCACAGACTCTG 600  
| E W T G S T S P V K C E F Q Q K S Q T L  
→ *Cm\_ighu3*  
601 | TCCAAGGAGGCAAGTTATCATTATGTGACCCCGGAGCAGCCAACAATTACAATAATCCCA 660  
| S K E A S Y H Y V T R E Q P T I T I I P  
661 | CCTTCCAACAATGACATGCTTATCAAAAGATCTGGCGACCTCGTGTGCAAGGCTGAAGGA 720  
| P S N N D M L I K R S G D L V C K A E G  
721 | CCATTGGGTTTCACTGGAATTAAGTGGGTTGCTAACGGTAAAGAGGTTGTTTCCCTATCT 780  
| P L G F T G I K W V A N G K E V V S L S  
781 | GAAAAGTTGTGTCTACGAAGGAGCAGTCTCACTCACCACCTCAATCTTTACGAAGAG 840  
| E K V V S T K A A I S L T T S I S Y E E  
841 | TGGCATAAGGGCATGAAATTTACCTGTGAGGTGCATCATTCTCATTTGCTCAGGGGTTT 900  
| W H K G M K F T C E V H H S S F A Q G F  
→ *Cm\_ighu4*  
901 | ATAACAGAAGTCTACAAAAGAGAAAATGGCCGAACGCCTAACTGCCAGGGGTTTCTTGT 960  
| I T E V Y K R E N G R T P N C P G V F L  
961 | CTCCCGCCACCAGAGAGCTCAAAATGGGGATTTGAAGACCTGACTTGCTATATAAAAAAC 1020  
| L P P P E S S N G D L K T L T C Y I K N  
1021 | TTTTACCCTAAGGAGTTGCTGTGTCTTGGCTTATTTGGTGATAAAACAAGTGGACAATGAG 1080  
| F Y P K E V A V S W L I G D K Q V D N E  
1081 | AGCATCACTAAAGTTATTGAGAAAAATGGCAACTTTTCAGCATAACAGTCAGCTGATTGTC 1140  
| S I T K V I E K N G N F S A Y S Q L I V  
1141 | AATCAGGACTCCTGGGGAAATGGCACAGAGTTCCACCTGCAATGTTTATCATGAGTCCATC 1200  
| N Q D S W G N G T E F T C N V Y H E S I  
1201 | ATGGATAATCTTCGCCACCTTTCCAGAACCATTACTGGCACTTCAAATCCACCTCCATA 1260  
| M D N L R H L S R T I T G T S N P P S I  
1261 | GTGAATCTCAGCCTAAATGTTCCCAAAACTGCCCAAATCCTGGTCTGTAAGATGTAGAG 1320  
| V N L S L N V P Q N C P N P G L \*  
1321 | ATCCTGGTGTGACCAACCTTTTCTACAATGAGACAGAACTTGATGATGACAACGTGGCA 1380  
1381 | ACCACTGCCTTAACATTTGTATTTCTTCTCCTCATCACCCTGTTCTACAGCATCGGGGTG 1440  
1441 | ACTGTTATCAAGGTGAAATGAGAAACAATAATGAACGATTTTGATTTTCTCTCTGTTT 1500  
1501 | TTTTCTTCTCAGTATAATGTTCTGAGTTACCTTTCTGTTAAACTATCTTCTCTTAGCT 1560  
1561 | ACTTTCATGTATTTTATATCTGTAATACTTTTTTGTGATTTAAATGTTGGATTTTTTT 1620  
1621 | TTCATGCTTTTACTCAAATCTCA**AATAAA**TGTCAAACATAGTAAACATTTATCAGATAA 1680  
1681 | TGTA

**Supplementary Fig. 6.** Nucleotide and translated amino acid sequences of the secreted IgM constant domain of the bighead catfish (*Cm\_slgM 1*, GenBank accession number MN934747). The sequence was consisted of three CH and two TM domains: C $\mu$ 1-C $\mu$ 2-C $\mu$ 3-C $\mu$ 4. The atypical polyadenylation signal (AATAAA) in the 3'-UTR was bold.

1  *Cg\_ighu1*  
GCAACGCAAGAACCCCGAAGTCTCTGTTTCCCGTGTGGCAGTGC GGCTCGTCCCCTGAT 60  
A T Q E A P K S L F P V W Q C G S S P D

61 GGTTCGTCACTCTGGGCTGCCTCACCCGCGACTTGGCAACCGGCGATGGACTGAGCTAC 120  
G F V T L G C L T R D L A T G D G L S Y

121 GTTTGGAAGGATGCGAGCGGCACCCGCGCTGACTACCGTTGTACAATACCCGGCAGTGCTG 180  
V W K D A S G T A L T T V V Q Y P A V L

181 GACAACGGAAAGTACTCCTCAGTGAGTCAGGCGCGCTCACTGCTACCGAGTGGGACGCG 240  
D N G K Y S S V S Q A R V T A T E W D A

241 AACAAAGCCGTTCACTTGCCAAGTCACTAATTCCATTGGAACCGCAACGGCGAACGTGCAA 300  
N K P F T C Q V T N S I G T A T A N V Q

301 AAACCACCTCTCGTCATCCCAGCAAAATCTCTGCTTCTAACAGCTCCGAGCCAAACAGAA 360  
 *Cg\_ighu2*  
K P P L V I P A K S L L L T A P S Q T E

361 ATAGACAATGGAACAGCTACCTTCATCTGCTTAGCTTCAGAATTTTCACCTAAAAACGCAC 420  
I D N G T A T F I C L A S E F S P K T H

421 ACATTTAAGTGGACCCGCGTAAAAGACAAGCCTCGATAGTAAGGCAAAAGCCCCAATTTTA 480  
T F K W T R E K T S L D S K A K A P I L

481 ATCCCGGGACAAAAAATTTACAGTGCCTTAAGCATTTTGGAACTCACTGCCAGCGAATGG 540  
I P G Q K I Y S A L S I L E L T A S E W

541 ATGGGCTCAACTTCTCCAGTTAAGTGTGAGTTCAGCACAAGGAACAGACTCTGTCCCAG 600  
M G S T S P V K C E F Q H K E Q T L S Q

601 GAAGCAAGTCATGGGACATGTGAGGAGCAGCCAAAAATGACAATAAGTCCACCTTCCAAT 660  
 *Cg\_ighu3*  
E A S H G T C E E Q P K M T I S P P S N

661 GGCATTCTTATCAATAGATCTGCTGATATTGTGTGCAAGGCTGAAGGACCAATGGGTTTC 720  
G I L I N R S A D I V C K A E G P M G F

721 ACCGCCATTAAATGGGTTGTTAACGGTAAAGAGGTTGCTTCCCTACCTCAAAGCGATGTG 780  
T A I K W V V N G K E V A S L P Q S D V

781 TCTTCGAAGACAGCGATCTCACTCACCACCACAATCTCTTATGAAGAGTGGCATACTGGC 840  
S S K T A I S L T T T I S Y E E W H T G

841 ACCAAATTTACCTGTGAGGTGTATCATTAGCTCAGGGATTTATACAAGAAGAC 900  
T K F T C E V Y H S A L A Q G F I Q E D

901 TACCAAAGAGTAAACTATGCCTTAACATTTGTATTTCTCTTCCCTCATCACTCTGTTCTAC 960  
 *Cg\_ighutm1*  
Y Q R V N Y A L T F V F L F L I T L F Y

961 AGCATCGGGTGTGAAATGGGAAACAATAATGGAACGATTTTGATTTTCTCTCTGTTT 1020  
 *Cg\_ighutm2*  
S I G V V K W E T T N G T I L I F S L F

1021 TTTTTTCTTCTTTCAGTATAAAGCTGATGCCGGGTTACTACATTGAGACAGAACTGATG 1080  
F F S S S V

1081 ATGAAAACGTGGCAAAACTGCCTTAACATTTGTATTTCTCTTCCCTCATCACTCTGTTCT 1140

1141 ACAGCATCGGGTACTGTTATCAAGGTGAAAT**AATAAA**CATTTAAAAGCCAAAAA 1200

1201 AAAAAAAAAAAAAAAAAA 1219

**Supplementary Fig. 7.** Nucleotide and translated amino acid sequences of the membrane-bound IgM constant domain of the north African catfish (*Cg\_mIgM* 1.1, GenBank accession number MN934748). The sequence was consisted of three CH and two TM domains: C<sub>μ</sub>1-C<sub>μ</sub>2-C<sub>μ</sub>3-TM1-TM2. The atypical polyadenylation signal (AATAAA) in the 3'-UTR was bold.

1  GC AACGCAAGAAGCCCCGAAGTCTCTGTTTCCCGTGTGGCAGTGGCGGCTCGTCCCCTGAT 60  
 A T Q E A P K S L F P V W Q C G S S P D  
 61 GGTTCGTCACTCTGGGCTGCCTCACCCGCGACTTGGCAACCGGGATGGACTGAGCTAC 120  
 G F V T L G C L T R D L A T G D G L S Y  
 121 GTTTGGAAGGATGCGAGCGGCACCGCGCTGACTACCGTTGTACAATACCCGGCAGTGCTG 180  
 V W K D A S G T A L T T V V Q Y P A V L  
 181 GACAACGGAAAGTACTCCTCAGTGAGTCAGGCGCGCTCACTGCTACCGAGTGGGACGCG 240  
 D N G K Y S S V S Q A R V T A T E W D A  
 241 AAC AAGCCGTTCACTTGCCAAGTCACTAATTCATTGGAACCGCAACGGCGAACGTGCAA 300  
 N K P F T C Q V T N S I G T A T A N V Q  
 301 AAACCACCTCTCGTCATCCAGCAAAAATCTCTGCTTCTAACAGCTCCGAGCCAAACAGAA 360  
 K P P L V I P A K S L L L T A P S Q T E   
 361 ATAGACAATGGAACAGCTACCTTCATCTGCTTAGCTTCAGAATTTTCACCTAAAACGCAC 420  
 I D N G T A T F I C L A S E F S P K T H  
 421 ACATTTAAGTGGACCCGTGAAAAGACAAGCCTCGATAGTAAGGCAAAGCCCAATTTTA 480  
 T F K W T R E K T S L D S K A K A P I L  
 481 ATCCCGGGACAAAAATTTACAGTGCCTTAAGCATTTTGGAACTCACTGCCAGCGAATGG 540  
 I P G Q K I Y S A L S I L E L T A S E W  
 541 ATGGGCTCAACTTCTCCAGTTAAGTGTGAGTTCCAGCACAAGGAACAGACTCTGTCCCAG 600  
 M G S T S P V K C E F Q H K E Q T L S Q  
 601 GAAGCAAGTCATGGGACATGTGAGGAGCAGCCAAAAATGACAATAAGTCCACCTTCCAAT 660  
 E A S H G T C E E Q P K M T I S P P S N   
 661 GGCATTCCTTATCAATAGATCTGCTGATATGTGTGCAAGGCTGAAGACCAATGGGTTTC 720  
 G I L I N R S A D I V C K A E G P M G F  
 721 ACCGCCATTAATGGGTTGTTAACGGTAAAAGAGGTTGCTTCCCTACCTCAAAGCGATGTG 780  
 T A I K W V V N G K E V A S L P Q S D V  
 781 TCCTCGAAGACAGCGATCTCACTCACCACCACAATCTCTTATGAAGAGTGGCATACTGGC 840  
 S S K T A I S L T T T I S Y E E W H T G  
 841 ACCAAATTTACCTGTGAGGTGTATCATT CAGCATTAGCTCAGGGATTTATACAAGAAGAC 900  
 T K F T C E V Y H S A L A Q G F I Q E D  
 901 TACCAAAGAGTAAACTATGCCTTAACATTTGTATTTCTCTTCTCATCACTCTGTTCTAC 960  
 Y Q R V N Y A L T F V F L F L I T L F Y   
 961 AGCATCGGGGTGGTGAATGGGAAACAATAATGGAACGATTTTGATTTTCTCTCTGTTT 1020  
 S I G V V K W E T T N G T I L I F S L F   
 1021 TTTTTTTCTTCTT CAGTATAAAGCTGATGCCGGGTTACTACATTGAGACAGAAACTGATG 1080  
 F F S S S V \*  
 1081 ATGAAAACGTGGCAAACACTGCCTTAACATTTGTATTTCTTCTTCTCATCACTCTGTTCT 1140  
 1141 ACAGCATCGGGGTGACTGTTATCAAGGTGAAATAATAAACATAAACAACTGATGGAATGA 1200  
 1201 GTTCGATCTTCTCTGTTTCGCCAGTATAATGTTCTGAGTTAACTTTCTGTTAAACTA 1260  
 1261 TCTTGCTCTCAGCTACTTTTCATGTGTTTATATCTGTAAATACTTTTTGTCAATTAAATG 1320  
 1321 TTGATTTCTTTTCATGCTTTTACTCAAATCTCA**AATAAA**TGCAATTAAAAGCCAAAAAAA 1380  
 1381 AAAAAAAAAAAAAAAAAAAAAA 1402

**Supplementary Fig. 8.** Nucleotide and translated amino acid sequences of the membrane-bound IgM constant domain of the north African catfish (*Cg\_mIgM* 1.2, GenBank accession number MN934749). The sequence consisted of three CH and two TM domains: C $\mu$ 1-C $\mu$ 2-C $\mu$ 3-TM1-TM2. The atypical polyadenylation signal (AATAAA) in the 3'-UTR was bold.



1  GCAACGCAAGAACCCCGAAGTCTCTGTTTCCCGTGTGGCAGTGC GGCTCGTCCCCTGAT 60  
A T Q E A P K S L F P V W Q C G S S P D

61 GGTTCGTCCTCTGGGCTGCCTCACCCGCGACTTGGCAACCGCGATGGACTGAGCTAC 120  
G F V T L G C L T R D L A T G D G L S Y

121 GTTTGGAAGGATGCGAGCGGCACCCGCGTACTACCGTTGTACAATACCCGGCAGTGCTG 180  
V W K D A S G T A L T T V V Q Y P A V L

181 GACAACGGAAGTACTCCTCAGTGAGTCAGGCGCGCTCACTGTACCGAGTGGGACGCG 240  
D N G K Y S S V S Q A R V T A T E W D A

241 AACAGCCGTTCACTTGCCAAGTCACTAATTCATTGGAACCGCAACGGCGAACGTGCAA 300  
N K P F T C Q V T N S I G T A T A N V Q

301  AAACCACCTCTCGTCATCCCAGCAAAATCTCTGCTTCTAACAGCTCCGAGCCAAACAGAA 360  
K P P L V I P A K S L L L T A P S Q T E

361 ATAGACAATGGAACAGCTACCTTCATCTGCTTAGCTTCAGAATTTTCACCTAAAACGCAC 420  
I D N G T A T F I C L A S E F S P K T H

421 ACATTTAAGTGGACCCGTGAAAAGACAAGCCTCGATAGTAAGGCAAAAGCCCCAATTTTA 480  
T F K W T R E K T S L D S K A K A P I L

481 ATCCCGGGACAAAAATTTACAGTGCCTTAAGCATTTTGGAACTCACTGCCAGCGAATGG 540  
I P G Q K I Y S A L S I L E L T A S E W

541 ATGGGCTCAACTTCTCCAGTTAAGTGTGAGTTCAGCACAAGGAACAGACTCTGTCCCAG 600  
M G S T S P V K C E F Q H K E Q T L S Q

601  GAAGCAAGTCATGGGACATGTGAGGAGCAGCCAAAAATGACAATAAGTCCACCTTCCAAT 660  
E A S H G T C E E Q P K M T I S P P S N

661 GGCATTCTTATCAATAGATCTGCTGATATTGTGTGCAAGGCTGAAGGACCAATGGGTTTC 720  
G I L I N R S A D I V C K A E G P M G F

721 ACCGCCATTAATGGGTTGTTAACGGTAAAGAGGTTGCTTCCCTACCTCAAAGCGATGTG 780  
T A I K W V V N G K E V A S L P Q S D V

781 TC'TTCGAAGACAGCGATCTCACTCACCCACAATCTCTTATGAAGAGTGGCATACTGGC 840  
S S K T A I S L T T T I S Y E E W H T G

841 ACCAAATTTACCTGTGAGGTGTATCATTCAGCATTAGCTCAGGGATTTATACAAGAAGAC 900  
T K F T C E V Y H S A L A Q G F I Q E D

901  TACCAAAGAGTAAACGGCCAAACGCAATGCCAGAGCTTTTCTTGTCTCCCTCCACCAGAG 960  
Y Q R V N G Q T Q C P E L F L L P P P E

961 AGCTCAAAGGGGATTCATGACCCTGACTTGCTATATTAAGGACTTCTACCCTAAGGAG 1020  
S S K G D S M T L T C Y I K D F Y P K E

1021 GTTGTGTGTCTTGGCTTGTGGTGATAAACTAGTGGACAATGAGAGCACTGTTAAAGTT 1080  
V A V S W L V G D K L V D N E S T V K V

1081 ATTGAGAAAAATGGCATCTTTTTCAGCATAAGTCAAGTCAATTTGTCGATAGGGCAGACTGG 1140  
I E K N G I F S A Y S Q L I V D R A D W

1141 GAAAAATGGCACTGTGTTCACTGCAATGTTTATCATGAGTCCATCGTAGAGAGTGTGGCG 1200  
E N G T V F T C N V Y H E S I V E S V R

1201 CACCTTTCTAGATCCGTTGCTGGTAATTCAAATCCACCCTCCGTAGTGAATCTCAGCTTA 1260  
H L S R S V A G N S N P P S V V N L S L

1261 AATGTTCCCCAAACTGCCCAATGCTCTGTAAGACTGATGCCGGGTTACTACATTGAGA 1320  
N V P Q N C P N A L \*

1321 CAGAACTGATGATGAAAACGTGGCAAACTGCCTTAACATTTGTATTTCTTCTCTCA 1380  
1381 TCACTCTGTCTACAGCATCGGGTGACTGTTATCAAGGTGAAAT**AATTAAT**GCAATTAA 1440  
1441 AAGCCAAAAAAAAAAAAAAAAAAAAAAAAAAAAA

**Supplementary Fig. 9.** Nucleotide and translated amino acid sequences of the secreted IgM constant domain of the north African catfish (*Cm\_slgM* 1.1, GenBank accession number MN934750) and hybrid catfish (hybrid:*Cg\_slgM* 1.1, GenBank accession number MN934752). The sequence was consisted of four CH domains: C $\mu$ 1-C $\mu$ 2-C $\mu$ 3-C $\mu$ 4. The atypical polyadenylation signal (AATTA) in the 3'-UTR was bold.

1 GCACACAGAAAGCCCGGAGTCCCTGTTCCCGTGGCAGTGGCGTCCGCTCCCTCGAT 60 3661 gagatcctgggtgctgaccaaccttttctacaatgagacagaacttgatgatgacaacgtg 3720

61 GATQEPKSLFPVWQCGSSPD 120 3721 gcaaccactgcttaacatttctctctcctcaccctgttctacagctcggg 3780

121 GGTTFGTCACCTGGGCTCGTCCACCCGGCCTGGCAACCCCTGATGGACTGAGCTAC 120 3781 gtgactgtatcaagtgaaatgagaacaactaatggaaactgtttgatttctctctg 3840

181 GTTTGAAGGATGCGAGCGCCCGCTGACTACTAAGCTTGTACAAATCCCGCGGTG 180 3841 ttttttttctcagataaattgctgagttacccttctgttaaacatctctctctta 3900

241 ATCGAGGGCGGAAAGTACTCTCAGTGTAGTCCAGCGCGCTCAGTGTTCACACTGGAAC 240 3901 gctactttccatgattttatctctgtaaaactttttgtcatttaaatgttgatttt 3960

301 AAAAGCCAGtagggcaaaaatcctcaaacaccattttgtgtgattttcaataagca 360 3961 tttttctgcttttactcaaatcctcaataaaaaaagaagaagaataaataaaca 4020

361 gtaaaagctgtttgttcttttctgtcccttttacgaataaacatgaaaataattg 420 4021 ttaagtatttttaaatgaagaagaatgatctaaagctcccccacaactcagcaat 4080

421 caccctaaagggcgatgcccgaagatttaatttacttaaaatgtaattgaaatcata 480 4081 gtgtgtatgtgtctgttgcattcagttactttgtcaagctttattgtgtgctctg 4140

481 accttggatggctccctattgataagagaatgtacaggttatactgtgcttactt 540 4141 tttttttcagatgattttatctctgtaaaactttttgtcatttaaatgttgatttt 4200

541 tgaactgactgtgctcaggtgatttgatattatgtgcaatgcatagtaaccaagaatac 600 4201 tctccagcaagcaagacattgagcactcgttaagtagagagttttttctaccctt 4260

601 aaatagatatacatttgccttaaacataaaataaaactacacttaaacattataa 660 4261 tttttttcagcaggttaccgatataatgttaccataaacactcaaccaaaagcttt 4320

721 attaaagaaagttcttttaagctccatttttaaatagaaaggttaaaaacaacagata 780 4321 cactactagaatgacttattgggctacacaaatagccataaacataaatgccaacaaac 4380

781 tcaactacacacacacacacacacacacacacacacacacacacacacacacacacata 840 4381 ataacagtgattgcttatacaattttaccagtaaacgtggtgacaggtcattgtgcc 4440

841 tgtgttagagtgccactaatcagactgtttcagacaatcagaaaaataaaagattcaaat 900 4441 caaggtcacaagggcagccactcgtgccaatccccaaagaaagccaaatcagcagaat 4500

901 aaagactgtttatcctcagaaacccctgagtgacatacttctgtagatgtttaaaacttt 960 4501 tctgtaaaacaccagcaacactagtgacacacactcctgcacatgtgcacaaaggtatc 4560

961 ctaaattttgggtgtaactctctctctctctctctctctctctctctctctctctctct 1020 4561 acaattttgggcaataatgtttgtgtaactgttattgtctgattgtggtgtaaccatga 4620

1021 tgagcattattcttgggaaaaatgagcaaatgacatgaaatagacggttaagcagaat 1080 4621 gggaggtgctgattgtgctggatatacagatggctgtgatacaaatcagatcaggggt 4680

1081 aatctcagatgttttaactcatttaagttgttttaataaaaaaaagaaatgctgcag 1140 4681 gcagctggagctgacaacaacagttgacccaacagttagtgatttaaacaggttaatt 4740

1141 tctttacacactgagacagctgcttgggccccataaaaagggctgactaaaattttataat 1200 4741 tttggatggaaatccagTATGCCTTAACATTGTTATTTCTTCCTCATCACCCTGCTTCT 4800

1201 tccccaaaagggaaatcccggtgaaatccccctgggaaatatttaagttaaaagcaagc 1260 4801 ACAGCTCGGGgtattggattgaaaggaagtttggtaaaatttttccaccaacccctctt 4860

1261 attttaaaatccaaagcttatttactctctgactctctctctctctctctctctctctct 1320 4861 Y S I G 4920

1321 caatgttgccttttttactgagaaatgaaatccccctgggaaatatttaagttaaaagca 1380 4921 caaagatttttgattgaggttgatttcaattggctgaaatgaaatcctcagttccagaa 4980

1381 taaaatacactcaaatgtttgctgtgcaaaaacagtaataagttgactagtaataat 1440 4981 tcactctcaaattttgactcctgatgaatcactatgcaactagaaatgctcgtggc 4980

1441 taatattaaaggtgttttaactcatttaagttgttttaataaaaaaaagaaatgctgcag 1500 4981 tcaagatttttgattgaggttgatttcaattggctgaaatgaaatcctcagttccagaa 4980

1501 taatgcaactgtttttaccataatttttttagtatagatacaaacatgatgggttctgt 1560 4981 taatcccaatctcttggctgacttgcttaaaatgggggtgtttggccacagggctgt 5040

1561 taatgcaactgtttttaccataatttttttagtatagatacaaacatgatgggttctgt 1620 5041 taatcccaatctcttggctgacttgcttaaaatgggggtgtttggccacagggctgt 5100

1621 ttgctgattacaatatttcaattgtctgaaagttgtgcaaaaaaaatatacaactaa 1680 5101 tctatgatacaactcacaacatatttgaacttaattgtcagcagactcttaagtatttt 5160

1681 tttgctgattacaatatttcaattgtctgaaagttgtgcaaaaaaaatatacaactaa 1740 5161 ctatgatacaactcacaacatatttgaacttaattgtcagcagactcttaagtatttt 5220

1741 tttgctgattacaatatttcaattgtctgaaagttgtgcaaaaaaaatatacaactaa 1800 5221 tatattttgggtgaaagctctcactacagaaatcccccaactgatagaacacatact 5280

1801 ggactatagatataatatactgtgtaaaattttactacagaaatatacaactcc 1860 5281 ttttaatttcaattgttacaactgttcaactgttcaacttaaaatgataaaagggattt 5340

1861 aactgcataagaatttttagcactcgtgataaaatttagatatttaggggtataaaaat 1920 5341 taacagcagctcagcaataattttgactcactaaacttataagttataaaaggttttag 5400

1921 agcatttttgggtgttcaataactgtggaacaacactctatttcaataactgctatgc 1980 5401 taccacaagttgattgaaatgcaacttctttaaactgaaagaaagaaaaaacaggaaga 5460

1981 ctattgctgctgcatatggatctgtttgtttgtttgcaagTTCGCGCCGACCTGCTGC 2040 5461 atgagactcactgtttttatataatagataaatgacattgtttgtggatcctcagat 5520

2041 AAAATCTCTGCTTCTAACAGCTCCGAGCCAAACAGAAATGGAACACTACTCT 2100 5521 tctgtaaacataaaatgtttaaaaggttacaattgggaaatataatgtcataagagaac 5580

2101 CATCTGCTTAGCTTTCAGAAATTTACCTAAAAGCTCCACATTTAAGTGGACCCGTTGAG 2160 5581 gaaacacactcagggaggtcctgttataagataaaagactatagaataaagat 5640

2161 AACAAAGCATCGATAAATAGGCCAAGACCCCACTTTAATCGCGGGAAAACTTACTACAG 2220 5641 caactaatacaaaaatatacaactccttcttactcttacttactatagatgataaata 5700

2221 TTCCTTTAGTATTTGGTACTACTGCTCCGCAAGTGGACTGCTCAACTCTCTCAAGTTAA 2280 5701 taatatttccccataatataatagataaaacagaaatcactatagtttaaaatt 5760

2281 GTCCGAGTTCCACGACAGACTCTGTCGAAGAGGCAAGTTATGtatgtatttaa 2340 5761 gtttctcaataaaatgtaattgtcacttcttactcactactactactactactactatt 5820

2341 gtaattcacttagttttatgtaggaaaaattctgtaacagcatttgaactttttcttac 2400 5821 gttgttgaacttaattgttttaaaatgattgctccaaataaaatgattttgatgtgct 5880

2401 accatagataaagacactgttttttaatacaagagtaacaaaactcgttaaatcttgyaa 2460 5881 tgaggtaaaaatgaaatgaaatgaaatgaaatgaaatgaaatgaaatgaaatgaaatgaa 5940

2461 actgaaattttagtactattttgaccttatttgaatgaaatgcaaggtgatttataat 2520 5941 aatatacagctcagctggtttcaatgaaataaaactcctgaaaaagtcagatattgt 6000

2521 gattattttttagtactattttgaccttatttgaatgaaatgcaaggtgatttataat 2580 6001 tgcgttggattttgtttttatgaaagaaacttaaaatcaatataaataattttgtct 6060

2581 gtttctttaaagtataaatttctttcttcaaaaacttatttctacactctctccac 2640 6121 acaacaaaaatataatgctcaactcactcaactcaactcaactcaactcaactcaactca 6120

2641 agcaactattgaccgggagcagcaacaatatacaataatccccactccaacaatgacatg 2700 6121 ttttttttctcagataaagttttgtttgtttgttttttttttttttttttttttttttt 6180

2701 cttcaaaaaattccgggattttccacagcattttagtggcgggagcggcgaactatc 2760 6181 TGACTCTTATCAAGGTGAATGGGAAACAACTAATGAGCAATTTGATTTTCTCTCTGT 6240

2761 AATAATCCACCCTTCCAACAATGACATGCTTATCAAAGATCTGGCGACCTCGTGTGCAA 2820 6241 V T V I K V K W E T N G T I L I F S L 6300

2821 GGCTGAAGGACCATTTGGTTCACGGAATTAAGTGGGTGCTAACGGTAAAGAGGTTGT 2880 6301 TTTTTCCTTCTCAGTATAAgttttgtttgtttgttttttttttttttttttttttttttt 6360

2881 ATCCCTATCTGAAAAGTTGCTACGAGGCGAGTCTCACTCACCCCAATCTC 2940 6361 accotttctgtatcactagaagatctcactacacagcggaaataactttggacatttaaa 6360

2941 S L S E K V S T K A A I S L T T S I S 3000 6361 tgttggcaatttttttctcagctcactcaaatcctcaataaaatattgacaaaaatag 6420

3001 Y E E W H K G M K F T C E V H H S S F A 3060 6421 caattaaaagctcaattttctgtactcttatttgaattatagtcagccttaagat 6480

3061 tacatatactgttttttaatttgcagtagaaaagctatatagaacttttaaaaaaagtaga 3120 6481 gttgtttagttatagcttatacactgcttcttattttatagtttttaaaaaatta 6540

3121 aaatcacattttatccaatgctactgaaatgttaagctttttttgtttgtttact 3180 6541 ttaagacgtttcagcagcagtagttttctcagtttctgtgtgaaacatagtaaaact 6600

3181 tgtgaccaatgttccccacaatacaaaaaaatgtgagagaagaaactgatcatgtttt 3240 6601 attaggttatttttttttttttttttttttttttttttttttttttttttttttttttt 6660

3241 gttgttaactatgatttcatgttcatagGGCGAAGCCCTAACTGCCAGGGGTTTCTT 3300 6661 caacotttctcaaatgagacagaacttgatgaaacagctggcaacacactgcttaac 6720

3301 G R T P N C P G V F L 3360 6721 atttgtatttctctcctcactcaactgttctcaagactcgggtgactgttatcaaggt 6780

3361 L P P P E S S N G D L K T L T C Y I K N 3420 6781 gaaatgagaaacaataaa 6798

3421 CTTTTACCTAAGGAGTGTGCTGTCTGGCTTATTGGTGATAAACAAGTGGCAATGA 3480

3421 GAGCATCAATAAGTTATTGAGAAAAATGGCAACTTTTTCAGCATACAGTCACTGATGT 3540

3481 S I T K V I E K N G N F S A Y S Q L I V 3600

3541 CAATCAGGACTCTGGGAAATGGCACAGATTCACCTGCAATGTTTATCATGATCCAT 3660

3601 N Q D S W G N G T E F T C N V Y H E S I 3660

3601 CATGGATAATCTCGCACCTTTCCAGAACCTTACTGGCACTTCAAATCCACCCTCCAT 3660

3601 M D N L R H L S R T I T G T S N P P S I 3660

3601 AGTGAATCTCAGCTAAATGTTCCCAAACTGCCAAATCTGGTCTGTAAGtagtata 3660

3601 V N L S L N V P Q N C P N P G L \*

**Supplementary Fig. 10.** Complete nucleotide and translated amino acid sequences of the *ighu* gene of the bighead catfish and their hybrid catfish (GenBank accession number MZ559374 and MZ559376, respectively). The atypical polyadenylation signals (AATTAAA) in the 3'-UTR were bold.

1 **→Cg.ighu1**  
GCAACCAAGAGCCCGAAGTCTCTGTTCCTCCGCTGGCAGTGGCGCTCGTCCCTCGAT 60  
A T Q E A P K S L F P V W Q C G S S P D  
61 GGTTCGTCACCTGGGCTGCCCTCACCCGCGACTGGCAACCGCGATGGACTGAGCTAC 120  
G F V T L G C L T R D L A T G D G L S Y  
121 GTTGGGAAGATGGAGCGGCACCGCGCTGACTCCGCTGTGACAAATACCCGGCAGTGTG 180  
V W K D A S G T A L T T V V Q Y P A V L  
181 GACAACGGAAAGTACTCTCAGTGTGAGTGGAGCGCGCTCAGTCTACCGAGTGGACGGC 240  
D N G K Y S S V S Q A R V T A T E W D A  
241 AACAAAGCCCTTCACTTGGCAAGTCAATAATTCATGGAAACCGCAACCGCGAAGCTGCAA 300  
N K P F T C Q V T N S I G T A T A N V Q  
301 AAACACCTGTgaaaaatactacaaaacataatTTTTGTGTCTTTTCCAAAATAAGCAGT 360  
K P P  
361 gaaagtcgtgattattatgtaaatattgacataatactcacacacgaacacacagaca 420  
ctctcagggaaagaaaattgtaccaaaatttttgcoccttggtaggccaagacttt 480  
421 attcctttattctgtaccttttacgagaaacatgaaaataatgcaacctaaaggccca 540  
481 gtgcctgatatttaaatatttactcctaaagcgaattaaaataatgttaactttaaaca 600  
601 agcaactatgacatcttcaaaaacagagaatgtacagtttagactgtgcttagattac 660  
661 tgataacagactgtggcaggtgctttgagcaatggtaatttattattatagattatc 720  
721 catagtaaacagcaattaaatagtaatacatttgcctcaactacaaaaataaaactat 780  
781 acacttaccattcatgatacttttaactttaaattgtacaactatctgaattgtttatcca 840  
841 acacagtttaagcttaccattaaatgacatttctgtagaaggtactcattttaaagaaga 900  
901 agttaaacaacagtaagtaagtgctacatgaatgtagaggtgtagaggtgcaactaa 960  
961 cacagggtttcagagaatcagagaaatacaaaatcaaaatacaacaggttttttccctaa 1020  
1021 agactcagtgctgcaataaaactttaccaaaatttggtygtaactcttcttagctacat 1080  
1081 gtttaagcctattagcttatcagctctctgtgtgagcataatTTTTGGGAAATGATG 1140  
1141 aatgacatgaaatcagacagtaagcaaaatcaatgtctgcaattagtttttactctt 1200  
1201 ttaagtccttttaaaaaaagaaatgctgcatgtcttaacacactgagacca 1260  
1261 gtctgctttggccattaaaatgtctacatgaatgattttccctaaaggcttacc 1320  
1321 gttgatacagcaggaattttatgcaagcattttaaactcocaagtttttactt 1380  
1381 tctgactcttctctgccaatgctgcaaaagctgtttcttttcttagctgatt 1440  
1441 gactttttgctggtgccaagctgatttaccagaatacactcaaatgttgcgtggc 1500  
1501 aaaaaacagtaaaagttagattttaccagactgatttttaactgttcccagatagaat 1560  
1561 tttacttttccatgctcaaaactactctacatttggtaaccctaaatatt 1620  
1621 tttattatagaatacaacatgatgggttctgtatgagaanaaatagctataatcaagttg 1680  
1681 ttgaataatgtgaaatggtttattataattttgccaactcaagtttctgctgataaaaat 1740  
1741 taaatttcttgaagttaaaaaatgttaaatatatacaactaccaatattttactgagaa 1800  
1801 gatttaaaacagcttcttctgtaacaggttaaaaattgtgctcctcaaaaaaacaacaa 1860  
1861 aaaaaaacctgcaatattaatgcttgggaatttagtttgaataaactacacattta 1920  
1921 aaaaattgtttgtttattactagtttataattatgatacaagctggtgaaattgtta 1980  
1981 aatagaaataatatacaactcctaaagaaattttatggcactgataaaaatcca 2040  
2041 gatataaagtttataaaaaggtattttgtgcttataatctgctgcaaacatttt 2100  
2101 atttcaaacctgacagctcgtgcttattgtgctgagatggatctgtgtgtttg 2160

2161 ttttgaagctgagcag**→Cg.ighu2**CTCGTCATCCAGCAAAATCTCTGTTCTAACAGCTCCGAGCC 2220  
L V T P A K S L I L I T A P S  
2221 AACACGAAATAGACAATGGAAACAGCTACTCTCATCTGCTTACCTTACGAAATTTCACTA 2280  
Q T E I D N G T F I C L A S E F S P  
2281 AACCGCACACATTTAAGTGGCCGCGTAAAGACCAAGCCCTCGATAGTAAGGCCAAAGCCC 2340  
K T H T T F K W T R E K T S L D S K A K A  
2341 CAATTTTAAATCCCGGACAAAATAATTACAGTGCCTTAAGCATTTTGGAACACTACTGCCA 2400  
P I L I P G Q K I Y S A L S I L E L T A  
2401 GCGAATGGATGGGCTCAACTTCTCCAGTAAAGTGTGACTTCCAGCACAAGGAACAGACT 2460  
S E W M G S T S P V K C E F Q H K E Q T  
2461 TGTCCAGGAAGCAAGTCAATGGGACAGtatgtattaaagtatttctactttagttttatga 2520  
L S Q E A S H G T  
2521 ctatgatttttttcaaatgaaaatttctttaacagcatttgacttcagttgtattc 2580  
2581 ttacaccatagataaagttactgttttttaagaaacaatacaaaagtaattgttaaatctt 2640  
2641 gtactcaaatataatgtaataattgttcttctattgtaagtaaatgtaaatgatgtatt 2700  
2701 attattttactgttaattgtgcaataaaaactcaggtatttttccagattgtaaatccaagt 2760  
2761 tcttttaattacacaaaattttgtttcttgataaactatttctacacctcttttacag 2820  
2821 TGTGAGGAGCAGCCAAAATGACAATAAGTCCACCTTCCAATGGCATTCTTATCAATAGA 2880  
C E E Q P K M T I S P S N G I L I N R  
2881 TCTGCTGATATTGTGCAAGGCTGAAGACCAATGGGTTTACCGCGCATTAATGGVTT 2940  
S A D I V C K A E G P M G F T A I K W V  
2941 GTTAACGGTAAAGAGGTGCTTCCCTACCTCAAGCGDGTGCTTCGAAAGACAGCGATC 3000  
V N G K E V A S L P Q S D V S S K T A I  
3001 TCACTCACCACCAACTCTCTTATGAAGAGTGGCATACTGGCACAATAATTACCTGTGAG 3060  
S L T T T I S Y E E W H T G T K F T C E  
3061 GTGTATCATTAGCATTAGCTCAGGATTATACAAGAAGACTACCAAGAGTAACGta 3120  
V Y H S A L A Q G F I Q E D Y Q R V N  
3121 ggaatcgtgtttactttttacatatttctgttttaatttgcagagaaagcttaaaa 3180  
3181 aaaaagcaaaaatcacatttttatatccagtgctactgaaattatggaattattatatt 3240  
3241 gttaaagctttttttgtgtttactgtgaccaatgttcccaaacgtacaaaaacaa 3300  
3301 tttaaagaaagaaactgatcatgctttgtgttaactatgattttatgttccatag**→Cg.ighu4**GGCC 3360  
G  
3361 AAACGCAATGCCAGAGCTTTTCTGTCTCCCTCACCCAGAGCTCAAAGGGGATCA 3420  
Q T Q C P E L F L L P P P E S S K G D S  
3421 TGACCTGTACTGTCTATTTAAGGACTTCACTCCCTAAGGAGTGTGCTGCTGGCTTG 3480  
M T L T C Y I K D F Y P K E V A T V T S W L

3481 TTGGTGATAAACTAGTGGACAATGAGACACTGTAAAGTTATTGAGAAAAATGGCATCT 3540  
V G D K L V D N E S T V K V I E K N G I  
3541 TTTTCAGCATAACAGTACAGCTAATTTGCGATAGGGGAGCAGCTGGGAAAAATGGCACTGTGTTCA 3600  
F S A Y S Q L I V D R A D W E N G T V F  
3601 CCTGCAAAAGTTTATCATGAGTCCATCGTAGAGACTGTGCCCACTTTCTAGATCCGTTG 3660  
T C N V Y H E S I V E S V R H L S R S V  
3661 TCTGGTAATTTCAATCCACCTTCCGTAGTGAATCTCAGCTTAAAGTTTCCCAAAAGTGGC 3720  
A G N S N P P S V V N L S L N V P Q N C  
3721 CAAATGCTCTGTAAGtagctgatgccgggttactacattgagacagaaactgatgatgaa 3780  
P N A L \*  
3781 aacgtggcaaacactgccttaacattgtatttctctctctcatcactctgtttctacagc 3840  
3841 atcggggtgactgtttatcaaggtgaaataa**→Cg.ighu1**aaacataaaacaactgatggaatgagttcg 3900  
3901 atcttctctctgttttcgagcagataatgttctgagtttaactttctgttaaacatctctg 3960  
3961 tctcagctacttttcatgtgttttatatctgtaaacactttttgtcattttaaagttgat 4020  
4021 tcttttctcatgcttttactcaaatctcaaa**→Cg.ighu1**aaataaaaaaatgtaagaaagacaacact 4080  
4081 tggataaaaacattaaatatttacaatgatacaacagagaatgctctaaagcttccccca 4140  
4141 caatctgacaatgtgtgtagtctgttgcattctctgtaaatattttgtcaagctttaa 4200  
4201 tttgtgtctgtgttagttacatttcaaatatttcaatgagttgcaatgtcttagttt 4260  
4261 aatcactgttttctcaagcaagcagacattcagcaactctggttaagtagagaattt 4320  
4321 tttctaccttctccatgaaaggtgaggtctgcaactcaatgagttgcaatgtcttagtt 4380  
4381 caaagcttctacatacagaactgacatttagctacaccaattagtcataaacattaacg 4440  
4441 ccaacaacacttaccacataaacatggtgattattttaccagtaaacctggtga 4500  
4501 cagggctgtgaccccgctcaagggcagctcattctgttccacccacagcaagaa 4560  
4561 ccaatgtagcaaaaattgctgaaaaaagtaattgctggcattgatagcccccaaac 4620  
4621 cagtgcagcaactcctgacatggcctctgaggaacttaaggtcactgccccagcctct 4680  
4681 agacttcccaggtctcaatagaacaaagatccaaggaatgccccagacaacagccccca 4740  
4741 atccataaagggcctacccccacaacacagcaacaacaatgaatcgtgggtggctccccat 4800  
4801 tccaggtatcacatcacaacactccaaggtcattggcctgaaaggggcaaacctccca 4860  
4861 tttgtctttaaagggatctcccaacttggggcaaaaaggtttttgttttaagtt 4920  
4921 tattggcggaaaagggggaatccccctttaaaggggtgtatccccgggttttttccc 4980

4981 tttggggccgag**→Cg.ighu1**TATGCTTAACTTTGTTTCTCTCTCTCATCACTGTCTTACAGC 5040  
Y A L T F V F L F L I T L F Y S  
5041 ATCGGGGtaagctgtttatcaaggtgagaactgatccccagtaaacataaacccgggtgaat 5100  
I G  
5101 tccaggaacaaaaaatgtgtgtgcaaacacagatgttttagtccaattctgtgagttc 5160  
5161 tgttgactgtgtatgggattgctcttacatttaacataaacatagctgtaatttctaa 5220  
5221 cagtaatttttttaagaaaaactcaccacttaaatatttaattgactcactatttgataa 5280  
5281 ataatccacagacttaattatttgcatttttaatttagacagaaaataaaacttttt 5340  
5341 gagatggcagggcagggcaatttccatgttccaaaactcactataagaaatggtaaaatcca 5400  
5401 attgggtcaaaagggatcttaggaagagatttctataacagcagctctgacaataactttg 5460  
5461 ctatagctctcaatagaaaggttttagtatacaatatttagtaagctcaactaatt 5520  
5521 ttaacactcaaaagcagaaaaaggggggtgtagcaagagctcctgtttatgtttgtgttt 5580  
5581 tttattatagactctgtagatgtggatattgtaaacataaatgtttaaaaaggttac 5640  
5641 agttggaaatcctttgtaattgctatacacaataataaaacacttccagagagtg 5700  
5701 cgttatga**→Cg.ighu2**aaataagaataaaaaatataagaatacaataaacttataaacataa 5760  
5761 aactottaagtttttcaaacctttgtagttatactgttctattagaattataaata 5820  
5821 taatattttctctacatattatagaccaatacaaaagacacacataatttaaagattg 5880  
5881 cacttttaatacaaatgtaattgcaacttttactattgtactgttccataaaatgtttc 5940  
5941 gacccaatgttttaataaagtagctgcaataaaataatttttaattgttagttggggat 6000  
6001 aaaaagtaattgttttaaaaaaaataaaaaaacaggaataatatttaaagcttaaacg 6060  
6061 aatataatagacaggttctgacagctacagtaaatagtaataacattggaaggtca 6120  
6121 gaaatgtattgtgtttttgattttgttatttaattgagcagaaaactctgacaattgtg 6180  
6181 taaattcaaaaactgtcccaatatttgaattccacataaaaaagagagattag**→Cg.ighu2**GTGGT 6240  
V \*  
6241 GAAATGGGAAACAACATAAGAACAGATTTTGTATTTCTCTCTCTTTTTTTTCTTCTTCT 6300  
K W E T N G T I L I F S L F F F S S S  
6301 AGTATAAGtagctgatgccgggttactacattgagacagaaactgatgatgaaaactgg 6360  
V \*  
6361 caaacactgccttaaacattgtatttctctctctcatcactctgtttctacagcagctggg 6420  
6421 tgactgttatacaggtgaaata**→Cg.ighu1**aaacataaaacaactgatggaatgagttcgacttct 6480  
6481 cctgtttcgcaggtataatgttctgagttaaactttctgttaaacatctctgtctcagc 6540  
6541 tacttttctgtgttttatctgtaaacacttttctgacttaaatgttattttcttt 6600  
6601 catgcttttactcaaatccaaat**→Cg.ighu1**gcaataaaagcc 6641

**Supplementary Fig. 11.** Complete nucleotide and translated amino acid sequences of the *ighu* gene of the bighead catfish and their hybrid catfish (GenBank accession number MZ559375 and MZ559377, respectively). The atypical polyadenylation signals (AATTAA) in the 3'-UTR were bold.

| VH Number | VH      | DH                                    | JH              |
|-----------|---------|---------------------------------------|-----------------|
| VH 51     | GCA AAA | GAGGTTTACGGT                          | TAC TTT GAC TAC |
| VH 33     | GCA AGA | TCTC <u>GGGA</u> ATTGGGT              | GCT TTT GAC TAC |
| VH 6      | GCA AGA | <u>TACGGGA</u> ATTGGGT                | GCT TTT GAC TAC |
| VH 92     | GCT CGG | GGCT <u>ACGGT</u>                     | GCT TTT GAC TAC |
| VH 94     | GCC AGA | GAAGT <u>GGGGGC</u> TTCGGT            | GCT TTT GAC TAC |
| VH 50     | GCA AGT | <u>ACGGC</u> CCCCGGT                  | GCT TTT GAC TAC |
| VH 48     | GCT AGA | <u>GAGGGATACCGGG</u> GTGGGGGT         | GCT TTT GAC TAC |
| VH 75     | GCG CGC | <u>TGGA</u> <u>GCAGCTC</u> CCTTTACTAC | GGC TTT GAC TAC |
| VH 29     | GCA AGA | AGCAGCT <u>GGGCC</u>                  | GGC TTT GAC TAC |
| VH 100    | GCA CGT | CGGATAGCAGCT <u>TGGGAT</u> CTAC       | GGC TTT GAC TAC |
| VH 65     | GCG CGA | CAGTCAGATAGCAGCT <u>TGGG</u> GTCCC    | GGC TTT GAC TAC |
| VH 79     | GCT CGT | CGCATG <u>AGGGATAGCAGCTGG</u>         | TAC TTT GAC TAC |
| VH 45     | GCA AAG | TT <u>GGATAGCAGCTCG</u>               | TCC TTT GAC TAC |
| VH 10     | GCA AGT | TACATCCCT <u>GGGGGG</u> GATAC         | GGC TTT GAC TAC |
| VH 27     | GCA AGA | CACGGT <u>GGGGGG</u>                  | GGC TTT GAC TAC |
| VH 49     | GCA AAA | GGT <u>GGGGTGGGGGGG</u>               | TAC TTT GAC TAC |
| VH 61     | GCA AGA | <u>TGGGGGGGTACC</u>                   | TAC TTC GAC TAC |
| VH 9      | GCA AGA | TAT <u>CCGGGATTACC</u>                | TAC TTC GAC TAC |
| VH 81     | GCC CGT | AAAAATAACT <u>ACGGC</u> GCCGATAATACC  | TAC TTC GAC TAC |
| VH 63     | GCA CGA | <u>GACGGGA</u> ACTAC                  | TAC TTT GAC AAC |
| VH 46     | GCA AAG | TACAT <u>AGGGTCTGGAGCC</u>            | TAC TTT GAC TAC |
| VH 18     | GCA AGA | TACCAC <u>CCGGGGATAT</u>              | TAC TTT GAC TAC |
| VH 32     | GCA AGA | TACCAC <u>CCGGGGATAT</u>              | TAC TTT GAC TAC |
| VH 68     | GCA CGG | GAATAC <u>CCGGGTGGATAC</u>            | GGC TTT GAC TAC |
| VH 91     | GCT CGT | <u>ACCCGGTATAGCTATGGC</u> TATTCCTAC   | GGC TTT GAC TAC |
| VH 83     | GCC CGA | GAGATA <u>ACCGGGCGGATCTCACTAC</u>     | GGC TTT GAC TAC |
| VH 12     | GCA AGA | <u>GAGGCAGGG</u>                      | GCT TTT GAC TAC |
| VH 43     | GCA AGA | GAGTATT <u>GGGGTAATGGT</u>            | GCT TTT GAC TAC |
| VH 85     | GCC CGA | GATT <u>GGG</u> GTAATAGCCACAAT        | GCT TTT GAC TAC |
| VH 53     | GCA AGA | <u>TACCGG</u> TAGCTGGTATACAT          | GCT TTT GAC TAC |
| VH 76     | GCA CGC | <u>CAGGG</u> TAGCTGGTATTAT            | GCT TTT GAC TAC |
| VH 21     | GCA AGA | <u>TCTCGAGG</u> TTAC                  | GGC TTT GAC TAC |
| VH 4      | GCA AGA | <u>TACCGAGG</u> TTAC                  | GGC TTT GAC TAC |
| VH 41     | GCA AGA | GATTATAGCTATGGTAGTG <u>ACCGAC</u>     | TAC TTT GAC TAC |
| VH 14     | GCA AGA | GAGT <u>ACCGGGCAGGG</u> TATAAT        | TAC TTT GAC TAC |
| VH 23     | GCA AGA | G <u>CGGG</u> GAT                     | TAC TTT GAC TAC |
| VH 88     | GCC AGA | G <u>CGGGGC</u> CTACGTACGGCGAT        | TAC TTT GAC TAC |
| VH 52     | GCA AGA | GCTCC <u>CCGGATGGACT</u>              | GCT TTT GAC TAC |
| VH 7      | GCA AGA | GGGTCC <u>GGATGGACT</u>               | GCT TTT GAC TAC |
| VH 35     | GCA AGA | <u>GGGAGCACCGGT</u>                   | TAC TTT GAC TAC |
| VH 36     | GCA AGA | <u>GGGAGCCCGGCCGGT</u>                | TAC TTT GAC TAC |
| VH 34     | GCA AGA | <u>GAACATTATAGCTCCAAT</u>             | GCT TTT GAC TAC |
| VH 17     | GCA AGA | GAATATTATAACT <u>ACGACGGT</u>         | GCT TTT GAC TAC |

**Supplementary Fig. 12.** Partial nucleotide sequences and V<sub>H</sub>-D<sub>H</sub>-J<sub>H</sub> junction diversity of the VH domain of IgM heavy chain in bighead catfish. Core DH nucleotides are highlighted in yellow. Palindromic sequences or P-nucleotide are underlined with red. The N-diversity or N-nucleotides are non-highlighted letters which essentially observed at the VH-DH-JH junctions. The partial sequences are from a hundred unique nonredundant clones of VH domain, NCBI accession number sets are ordered from MN934442 to MN934541, respectively. Core DH segments were predicted using online tools, IgBLAST (<https://www.ncbi.nlm.nih.gov/projects/igblast/>), IMGT/HighV-QUEST ([http://www.imgt.org/IMGT\\_vquest/input](http://www.imgt.org/IMGT_vquest/input)), VDJsolver 1.0 Server (<http://www.cbs.dtu.dk/services/VDJsolver/>).

| VH Number | VH      | DH                                     | JH              |
|-----------|---------|----------------------------------------|-----------------|
| VH 6      | GCA AAG | TACATAGGGTCTGGAGCC                     | TAC TTT GCC TAC |
| VH 6      | GCA AAA | CCGCTCGGCTACGCTGAC                     | TAC TTT GAC TAC |
| VH 8      | GCA AGG | <u>ACCGATGAC</u>                       | TAC TTT GAC TAC |
| VH 22     | GCA AGC | CCGTGGGGTAGTGGGGAC                     | TAC TTT GAC TAC |
| VH 43     | GCA AAG | TACAGGGACCATAGCCACCGGTACGAC            | TAC TTT GAC TAC |
| VH 29     | GCG CGA | GGTTATACCCGGGTGGGGGACTACGGT            | TAC TTT GAC TAC |
| VH 71     | GCC CGT | CGGGTAGTGGGATACTACGT                   | TAC TTT GAC TAC |
| VH 31     | GCT CGG | GAACCGGTTAGCTATGGTAGTGCTACC            | TAC TTT GAC TAC |
| VH 72     | GCA CGC | AGAACGTATAGCTCTGTCTATCACGGT            | GCT TTT GAC TAC |
| VH 75     | GCC CGA | GTCGACTATAGCTCTGTCTATT <u>CCTACAAT</u> | GCT TTT GAC TAC |
| VH 14     | GCA AAG | <u>TACCGGGATGGA</u> TACGGT             | GCT TTT GAC TAC |
| VH 44     | GCA AGA | GACTGGATCGACGGT                        | GCT TTT GAC TAC |
| VH 53     | GCC CGG | GAGATCAGTCCTGGTGT <u>CACC</u>          | TAC TTC GAC TAC |
| VH 86     | GCA AGA | <u>GACCGGG</u> TAGTGGTGAG              | TAC TTC GAC TAC |
| VH 28     | GCA AAG | TTGGATAGCAGCTCG                        | TCC TTT GAC TAC |
| VH 94     | GCA CGC | TACGGGAGCTGGAGCAGCCGC                  | TAC TTT GAC TAC |
| VH 54     | GGC AGG | CGAGCTGGAGCTGGC                        | TAC TTT GAC TAC |
| VH 67     | GCT CGT | CGCATGAGGGATAGCAGCTGGAGT               | TAC TTT GAC TAC |
| VH 100    | GCT CGT | TTCCAGCTGGAGGC                         | TAC TTC GAC TAC |
| VH 19     | GCA AGC | CTTTATGGTAGCTACGCCGGCTAC               | TAC TTT GAC TAC |
| VH 33     | GCG CGC | <u>AACATACA</u> TGGTAGC                | TAC TTT GAC TAC |
| VH 76     | GCG CGC | <u>AACAT</u> CCGTAGA                   | TAC TTT GAC TAC |
| VH 19     | GCA AGC | CTTTATGGTAGCTACGCCGGCTAC               | TAC TTT GAC TAC |
| VH 33     | GCG CGC | <u>AACATACA</u> TGGTAGC                | TAC TTT GAC TAC |
| VH 76     | GCG CGC | <u>AACAT</u> CCGTAGA                   | TAC TTT GAC TAC |
| VH 66     | GCA AGA | TACGAACGTTACGGGGGGG                    | GCT TTT CAC TAC |
| VH 90     | GCA AGA | CACTATATACCCGGAAC                      | GGC TTT CAC TAC |
| VH 63     | GCG CGA | GAGAGGCAAGAGGGGCAGCCAC                 | GGC TTT CAC TAC |
| VH 73     | GCT GTC | TATTACTGCGTTCGCTACATGAGG               | GGC TTT CAC TAC |
| VH 36     | GCA AAA | <u>GGACA</u> TCCATATAGCTGGAGC          | AGC TTT CCC TAC |
| VH 7      | GCA AGA | GTCGGGCTCTACTAC                        | GGC TTT GAC TAC |
| VH 18     | GCA AGA | GTCGGGCTCTACTAC                        | GGC TTT GAC TAC |
| VH 35     | GCA AGA | <u>GGCCGGT</u> TATAGTGGCTATAACTATGGT   | TTC TTT GAC TTC |
| VH 48     | GCA AGA | <u>GGCCGGT</u> TATCCTGGCTATCCCTATGGT   | TTC TTT GAC TAC |
| VH 87     | GCA AGA | <u>TACAGGT</u> TATAGTGGCTATGGTGAGGGT   | GCT TTC GAC TAC |
| VH 84     | GCC AGA | GAGTACTCGGGT                           | CGG TTT GAC TAC |
| VH 1      | GCA AAG | <u>TACATAGG</u> GTTGGAGCC              | TAC TTT GAC TAC |

**Supplementary Fig. 13.** Partial nucleotide sequences and V<sub>H</sub>-D<sub>H</sub>-J<sub>H</sub> junction diversity of the VH domain of IgM heavy chain in north African catfish. Core DH nucleotides are highlighted in yellow. Palindromic sequences or P-nucleotide are underlined with red. The N-diversity or N-nucleotides are non-highlighted letters which essentially observed at the VH-DH-JH junctions. The partial sequences are from a hundred unique nonredundant clones of VH domain, NCBI accession number sets are ordered from MN934542 to MN934641, respectively. Core DH segments were predicted using online tools, IgBLAST (<https://www.ncbi.nlm.nih.gov/projects/igblast/>), IMGT/HighV-QUEST ([http://www.imgt.org/IMGT\\_vquest/input](http://www.imgt.org/IMGT_vquest/input)), VDJsolver 1.0 Server (<http://www.cbs.dtu.dk/services/VDJsolver/>).

| VH Number | VH      | DH                                   | JH              |
|-----------|---------|--------------------------------------|-----------------|
| VH 21     | GCA AGG | TTGTATAACTCTGGCTATGGTGCCGTCTAC       | GGC TTT GAC TAC |
| VH 95     | GCG CGA | CAGTCAGATAGCAGCTGGGGTCCC             | GGC TTT GAC TAC |
| VH 67     | GCA AGA | GGAGAAAACGAAATCACTACGCCTACC          | TAC TTC GAC TAC |
| VH 71     | GCA AGA | TATCCGGGATTACC                       | TAC TTC GAC TAC |
| VH 37     | GCA AGA | ACGGGGGTGGCC                         | TAC TTC GAC TAC |
| VH 94     | GCC CGG | GAGATCAGTAGTGGTGTCCACC               | TAC TTC GAC TAC |
| VH 22     | GCA AAA | TACTATAACTACGCC                      | TAC TTC GAC TAC |
| VH 06     | GCG GGA | GAGGGGGCTCCTACC                      | TAC TTC GAC TAC |
| VH 18     | GCC AAA | GGTGGTTATACT                         | TAC TTC GAC TAC |
| VH 12     | GCA ATG | TATAGTTTTGGC                         | GTC TTC GAC TAC |
| VH 24     | GTC CGG | GGACTTGACTAC                         | GTC TTC GAC TAC |
| VH 34     | GCG AGT | ACGGCCCGGT                           | GGT TTT GAC TAC |
| VH 25     | GGA AAA | GGACAATATGGGGGGTCCGAC                | TAC TTT GAC TAC |
| VH 15     | GGA AGA | TGCCCTATTGGGAGTAGTAGTAT              | TAC TTT GAT TAC |
| VH 13     | GCA AGA | ACCGCTGGACCAGCTCTC                   | CCT TTT GAC TAC |
| VH 39     | GCC AGA | CATTTGACGTATCTGGGTCC                 | GTC TTT GAC TAC |
| VH 88     | GCC CGA | GAGATAACCAGGGGGCGGATCTCACTAC         | GGC TTT GAC TAC |
| VH 26     | GCA AGA | GGCCGGTATAGTGGGTATAACTATGGTGCC       | TTC TTT GAC TTT |
| VH 85     | GCA AGA | GAGTACGCGGCAGGGTATAAT                | TAC TTT GAC TAC |
| VH 43     | GCA AGA | GAGTACGCGGCAGGGTATAAT                | TAC TTT GAC TAC |
| VH 42     | GCA AGA | GAGTACGCGGCAGGGTATTAT                | TAC TTT CAC TAC |
| VH 07     | GCA AGA | GCGGGAGAT                            | TAC TTT GAC TAC |
| VH 30     | GCA CGA | GAGGGGAGAT                           | TAC TTT GAC TAC |
| VH 36     | GCA GTA | GAGACCCCGGGGTAT                      | TAC TTT GAC TAC |
| VH 02     | ACC CGA | CTGGCTGGGGGGGATGAT                   | TAC TTT GAC TAC |
| VH 01     | GCA GAA | AATACGGGTCACGAA                      | TAC TTT GAC TAC |
| VH 60     | GCA AGA | GGCCGTCGGGAA                         | TAC TTT GAC TAC |
| VH 27     | GCA AGA | GAATATGGATCTGGTATTTGA                | GAC TTT GGC TAC |
| VH 11     | GCA AGA | GTCGGTATAATGGCGTACGGT                | GCT TTT GAC TAC |
| VH 17     | GCA AGA | GTCGGTATAATGGCGTACGGT                | GCT TTT GAC TAC |
| VH 33     | GCC AGA | GAGTATAGCTCTGTCTATGGTGCCCCAAT        | GCT TTT GAC TAC |
| VH 38     | GCA AGA | GATACCACTGTATAGCTCTGTCTATGGTGCTACGGT | GCT TTT GAC TAC |
| VH 98     | GCA CGG | GAATACCCGGGTGGATAC                   | GGC TTT GAC TAC |
| VH 09     | GCG AAA | CCTCTAACTATGCGGTAC                   | GGC TTT GAC TAC |
| VH 28     | GCA AGA | GAGAGGGACAAT                         | GCT TTT GAC TAC |
| VH 86     | GCA AGA | GAACATTATAGCTCCAAT                   | GCT TTT GAC TAC |
| VH 04     | GCA AGA | CTGGGTAC                             | GCT TTT GAC TAC |
| VH 16     | GCA AGA | CTCGCTCATTCCGGGTAGTGGTTAT            | ACT TTT GAC TAC |
| VH 05     | GCA AAA | TTAACAGCTAAT                         | GCT TTT GAC TAC |
| VH 80     | GCA AGA | TACGCGGTAGCTGGTATACAT                | GCT TTT GAC TAC |
| VH 29     | GCA AGA | GACGCAAGGTGGAGCAGGGGTG               | GTC TTT GAC TAC |
| VH 44     | GCA AGA | TACGAACGTTACGGGGGG                   | GCT TTT GCC TAC |

**Supplementary Fig. 14.** Partial nucleotide sequences and V<sub>H</sub>-D<sub>H</sub>-J<sub>H</sub> junction diversity of the VH domain of IgM heavy chain in hybrid catfish. Core DH nucleotides are highlighted in yellow. Palindromic sequences or P-nucleotide are underlined with red. The N-diversity or N-nucleotides are non-highlighted letters which essentially observed at the VH-DH-JH junctions. The partial sequences are from a hundred unique nonredundant clones of VH domain, NCBI accession number sets are ordered from MN934642 to MN934741, respectively. Core DH segments were predicted using online tools, IgBLAST (<https://www.ncbi.nlm.nih.gov/projects/igblast/>), IMGT/HighV-QUEST ([http://www.imgt.org/IMGT\\_vquest/input](http://www.imgt.org/IMGT_vquest/input)), VDJsolver 1.0 Server (<http://www.cbs.dtu.dk/services/VDJsolver/>).

| <b><i>ighμ</i>-CH<sub>1</sub></b> |   | <b>1</b> | <b>2</b> | <b>3</b> | <b>4</b> | <b>5</b> | <b>6</b> |
|-----------------------------------|---|----------|----------|----------|----------|----------|----------|
| Bighead catfish                   | 1 | -        | 100.00   | 82.35    | 82.35    | 72.55    | 38.61    |
| Their hybrid (mlgMH)              | 2 | 100.00   | -        | 82.35    | 82.35    | 72.55    | 38.61    |
| African catfish                   | 3 | 82.35    | 82.35    | -        | 100.00   | 66.67    | 38.61    |
| Their hybrid (slgMH)              | 4 | 82.35    | 82.35    | 100.00   | -        | 66.67    | 38.61    |
| Channel catfish                   | 5 | 72.55    | 72.55    | 66.67    | 66.67    | -        | 47.52    |
| Zebrafish                         | 6 | 38.61    | 38.61    | 38.61    | 38.61    | 47.52    | -        |

  

| <b>non-<i>ighμ</i> exons</b> |   | <b>1</b> | <b>2</b> | <b>3</b> |
|------------------------------|---|----------|----------|----------|
| Bighead catfish              | 1 | -        | 57.73    | 34.63    |
| Channel catfish (IgDH)       | 2 | 57.73    | -        | 36.49    |
| Zebrafish (IgDH)             | 3 | 34.63    | 36.49    | -        |

  

| <b><i>ighμ</i>-CH<sub>2</sub></b> |   | <b>1</b> | <b>2</b> | <b>3</b> | <b>4</b> | <b>5</b> | <b>6</b> |
|-----------------------------------|---|----------|----------|----------|----------|----------|----------|
| Bighead catfish                   | 1 | -        | 100.00   | 77.23    | 77.23    | 57.84    | 36.89    |
| Their hybrid (mlgMH)              | 2 | 100.00   | -        | 77.23    | 77.23    | 57.84    | 36.89    |
| African catfish                   | 3 | 77.23    | 77.23    | -        | 100.00   | 57.28    | 33.98    |
| Their hybrid (slgMH)              | 4 | 77.23    | 77.23    | 100.00   | -        | 57.28    | 33.98    |
| Channel catfish                   | 5 | 57.84    | 57.84    | 57.28    | 57.28    | -        | 34.62    |
| Zebrafish                         | 6 | 36.89    | 36.89    | 33.98    | 33.98    | 34.62    | -        |

  

| <b><i>ighμ</i>-CH<sub>3</sub></b> |   | <b>1</b> | <b>2</b> | <b>3</b> | <b>4</b> | <b>5</b> | <b>6</b> |
|-----------------------------------|---|----------|----------|----------|----------|----------|----------|
| Bighead catfish                   | 1 | -        | 100.00   | 69.70    | 69.70    | 45.92    | 32.99    |
| Their hybrid (mlgMH)              | 2 | 100.00   | -        | 69.70    | 69.70    | 45.92    | 32.99    |
| African catfish                   | 3 | 69.70    | 69.70    | -        | 100.00   | 43.75    | 25.00    |
| Their hybrid (slgMH)              | 4 | 69.70    | 69.70    | 100.00   | -        | 43.75    | 25.00    |
| Channel catfish                   | 5 | 45.92    | 45.92    | 43.75    | 43.75    | -        | 30.85    |
| Zebrafish                         | 6 | 32.99    | 32.99    | 25.00    | 25.00    | 30.85    | -        |

  

| <b><i>ighμ</i>-CH<sub>4</sub></b> |   | <b>1</b> | <b>2</b> | <b>3</b> | <b>4</b> | <b>5</b> | <b>6</b> |
|-----------------------------------|---|----------|----------|----------|----------|----------|----------|
| Bighead catfish                   | 1 | -        | 100.00   | 74.40    | 74.40    | 54.03    | 43.22    |
| Their hybrid (mlgMH)              | 2 | 100.00   | -        | 74.40    | 74.40    | 54.03    | 43.22    |
| African catfish                   | 3 | 74.40    | 74.40    | -        | 100.00   | 57.72    | 44.07    |
| Their hybrid (slgMH)              | 4 | 74.40    | 74.40    | 100.00   | -        | 57.72    | 44.07    |
| Channel catfish                   | 5 | 54.03    | 54.03    | 57.72    | 57.72    | -        | 42.62    |
| Zebrafish                         | 6 | 43.22    | 43.22    | 44.07    | 44.07    | 42.62    | -        |

  

| <b><i>ighμ</i>-TM</b> |   | <b>1</b> | <b>2</b> | <b>3</b> | <b>4</b> | <b>5</b> | <b>6</b> |
|-----------------------|---|----------|----------|----------|----------|----------|----------|
| Bighead catfish       | 1 | -        | 100.00   | 97.50    | -        | 84.00    | 76.00    |
| Their hybrid (mlgMH)  | 2 | 100.00   | -        | 97.50    | -        | 84.00    | 76.00    |
| African catfish       | 3 | 97.50    | 97.50    | -        | -        | 85.71    | 80.95    |
| Their hybrid (slgMH)  | 4 | -        | -        | -        | -        | -        | -        |
| Channel catfish       | 5 | 84.00    | 85.71    | 85.71    | -        | -        | 72.00    |
| Zebrafish             | 6 | 76.00    | 80.95    | 80.95    | -        | 72.00    | -        |

  

| <b>Overall <i>ighμ</i>-CH1-CH2-CH3-CH4</b> |   | <b>1</b> | <b>2</b> | <b>3</b> | <b>4</b> | <b>5</b> | <b>6</b> |
|--------------------------------------------|---|----------|----------|----------|----------|----------|----------|
| Bighead catfish                            | 1 | -        | 100.00   | 75.81    | 75.81    | 57.48    | 38.44    |
| Their hybrid (mlgMH)                       | 2 | 100.00   | -        | 75.81    | 75.81    | 57.48    | 38.44    |
| African catfish                            | 3 | 75.81    | 75.81    | -        | 100.00   | 56.97    | 36.34    |
| Their hybrid (slgMH)                       | 4 | 75.81    | 75.81    | 100.00   | -        | 56.97    | 36.34    |
| Channel catfish                            | 5 | 57.48    | 57.48    | 56.97    | 56.97    | -        | 39.95    |
| Zebrafish                                  | 6 | 38.44    | 38.44    | 36.34    | 36.34    | 39.95    | -        |

**Supplementary Table 1.** Similarity of amino acid sequences of the *ighμ* gene of the bighead catfish, north African catfish, hybrid catfish, channel catfish and zebrafish. Percent sequence similarity of *ighμ* gene determined using MATGAT version 2.0 software.
